# Supplementary material for: Surrogate endpoints for overall survival in chemotherapy and radiotherapy trials in operable and locally advanced lung cancer: a re-analysis of meta-analyses of individual patients' data
Source: PubMed Central journal article supplement (PMC3732017; doi:10.1016/s1470-2045(13)70158-x), 2013-06
Supplement: mmc1.pdf [file mmc1.pdf]

## **Supplementary appendix**

This appendix formed part of the original submission and has been peer reviewed. We post it as supplied by the authors.

Supplement to: Mauguen A, Pignon J-P, Burdett S, et al. Surrogate endpoints for overall survival in chemotherapy and radiotherapy trials in operable and locally advanced lung cancer: a re-analysis of meta-analyses of individual patients' data. *Lancet Oncol* 2013; published online May 14. [http://dx.doi.org/10.1016/S1470-2045\(13\)70158-X](http://dx.doi.org/10.1016/S1470-2045(13)70158-X).

## **List of contributors:**

### **Surrogate Lung Project Collaborative Group Secretariat**

S. Burdett, D. Fisher, C. Le Péchoux, A. Mauguen, S. Michiels, J.P. Pignon, J.F. Tierney.

### **Surrogate Lung Project Collaborative Group Advisory Board**

C.P.Belani, L. Collette, S. Dahlberg, T. Eisen, S.Mandrekar, M. O'Brien, M. Parmar, H. Pang, R. Paulus, J. Crawford, W. Sause, S.E. Schild, F. Shepherd.

### **Collaborators (listed alphabetically)**

R. Arriagada (Institut Gustave Roussy, Villejuif, France; Karolinska Institutet, Stockholm, Sweden),  
S. Atagi (Kinki-Chuo Chest Medical Center, Japan),  
A. Auperin (Institut Gustave-Roussy, Villejuif, France),  
D. Ball (Peter MacCallum Cancer Centre, East Melbourne, Australia),  
M. Baumann (University Hospital/Medical Faculty, Carl Gustav Carus Technische Universität Dresden and Helmholtz Center Dresden-Rossendorf, Dresden, Germany),  
K. Behrendt (Maria Skłodowska–Curie Memorial Cancer Center, Gliwice Branch, Poland),  
J. Belderbos (Netherlands Cancer Institute, Amsterdam, the Netherlands),  
B. Bergman (Sahlgrenska Academy, Gothenburg, Sweden),  
J.F. Bishop (Victorian Comprehensive Cancer Centre, Melbourne, Australia),  
J.A. Bonner (University of Alabama-Birmingham, AL, USA),  
M.C. Bozonnat (Université Montpellier I, Montpellier, France),  
H. Choy (The University of Texas Southwestern, Dallas, Tx, USA)  
G. Clamon (University of Iowa Hospital and Clinics, Iowa City, IO, USA),  
W.J. Curran (Winship Cancer Institute of Emory University, Atlanta, USA),  
D. De Ruysscher (University Hospitals Leuven/ KU Leuven, Belgium),  
B. Dautzenberg (Groupe Hospitalier Pitié Salpêtrière, Paris),  
R.O. Dillman (Hoag Cancer Center, Newport Beach, CA, USA),  
S. Dische (Mount Vernon Hospital, Northwood Middlesex, UK),  
J.Y. Douillard (Centre Rene Gauducheau, Nantes, France),  
A. Dunant (Institut Gustave-Roussy, Villejuif, France),  
P. Fournel (Institut de Cancérologie Lucien Neuwirth, Saint Etienne, France),  
K. Furuse (Japan-Multinational Trial Organization, Kyoto, Japan),  
S. Geyer (Mayo Clinic and NCCTG, Rochester, MN, USA),  
H.J.M. Groen (University Hospital Groningen, The Netherlands),  
P.A. Helle (Medisch Spectrum Twente, Enschede, The Netherlands),  
M. Henry-Amar (Centre François Baclesse, Caen, France),  
J.E. Herndon (Duke University Medical Center, Durham, NC, USA),  
J.P. Higgins (MRC Biostatistics Unit, Cambridge, UK),  
R.M. Huber (University of Munich & Thoracic Oncology Centre Munich, Germany),

M. Imaizumi (Nagoya University School of Medicine, Nagoya, Japan),  
B. Jeremic (The University Hospital, Kragujevac, Serbia),  
D.H. Johnson (Vanderbilt-Ingram Cancer Center, Nashville, USA),  
H. Kato (Tokyo Medical University, Tokyo, Japan),  
S.M. Keller (Montefiore Medical Center, NY, USA),  
A. Knuutila (Helsinki University Central Hospital, Helsinki, Finland),  
R. Koch (University Hospital and Medical Faculty Carl Gustav Carus, Dresden, Germany),  
CCE. Koning (The Academic Medical Center, Amsterdam, The Netherlands),  
C. Legrand (Université Catholique de Louvain, Louvain-La-Neuve, Belgium),  
T. Le Chevalier (InstitutGustave-Roussy, Villejuif, France),  
K. Mattson (Helsinki University Central Hospital, Helsinki, Finland),  
T. Mineo (Policlinico Tor Vergata University, Rome, Italy),  
F. Mornex (Centre Hospitalier Lyon Sud, Pierre Bénite, France),  
M. Nankivell (MRC Clinical Trials Unit, London, UK),  
J.H. Park (Korea Cancer Center Hospital, Seoul, South Korea),  
R. Paulus (RTOG Statistical Center Philadelphia, PA, USA),  
E. Rolland (InstitutGustave-Roussy, Villejuif, France),  
R. Rosell (Catalan Institute of Oncology, Hospital Germans Trias i Pujol, Barcelona, Spain),  
S. Sarihan (Uludag University, Turkey),  
M.I. Saunders ((Mount Vernon Hospital, Northwood Middlesex, UK),  
G.V. Scagliotti (S. Luigi Hospital, Torino, Italy),  
M. Schaapveld (Comprehensive Cancer Center North, The Netherlands),  
L. Seymour (Queen's University, NCIC Clinical Trials Group, Kingston, ON, Canada), F.A. Shepherd (Princess Margaret Hospital, Toronto, ON, Canada),  
T. Shibata (JCOG Data Center, National Cancer center, Tokyo, Japan),  
R.L. Souhami (Cancer Research UK, London, UK),  
S.G. Spiro (University College Hospital, London, UK),  
R.J. Stephens (MRC Clinical Trials Unit, London, UK),  
L.A. Stewart (University of York, York, UK),  
G.M. Strauss (Tufts Medical Center, Boston, MA, USA),  
R. Sylvester (EORTC Headquarters, Brussels, Belgium),  
H. Tada (Osaka City General Hospital, Osaka, Japan),  
F. Tanaka (Hyogo College of Medicine, Nishinomiya),  
V. Torri (Istituto di RicercheFarmacologiche "Mario Negri", Milan, Italy),  
A.T. Turrisi (Sinai Grace Hospital, Detroit, MI, USA),  
A. Uitterhoeve (Academic Medical Center, Amsterdam, the Netherlands),  
K. Ulm (InstitutfürMedizinischeStatistik und Epidemiologie, Munich, Germany),  
H.C. Ulutin (GATA Radiation Oncology Department, Ankara, Turkey),  
J. van Meerbeeck (Ghent University & Antwerp University Hospital, Belgium)  
H. Wada (Kyoto University, Kyoto, Japan),

D. Waller (Glenfield Hospital, Groby Road, Leicester),  
 X.F. Wang (Duke University Medical Center, Durham, NC, USA),  
 K. Winter (RTOG Statistical Center Philadelphia, PA, USA),  
 G.C. Xu (Sun Yat-Sen University Cancer Center, Guangzhou, China),  
 T. Yamanaka (National Kyushu Cancer Center, Fukuoka, Japan),  
 A. Zajusz (Maria Skłodowska–Curie Memorial Cancer Center, Gliwice Branch, Poland).

**Contents of appendix:**

**Appendix A1: Description of trials – operable patients..... 4**

**Appendix A2: Description of trials – locally advanced patients, sequential CT ..... 7**

**Appendix A3: Description of trials – locally advanced patients, concurrent CT ..... 8**

**Appendix A4: Description of trials – locally advanced patients, sequential versus concurrent CT ..... 10**

**Appendix A5: Description of trials – radiotherapy trials ..... 11**

**Appendix A6: Cumulative percentage of DFS/PFS events..... 13**

**Appendix A7: Summary of data ..... 15**

**Appendix A8: Surrogacy analyses results..... 17**

**Appendix A9: Sensitivity analysis: different cut-off points ..... 26**

**Appendix A10: Leave-one out crossvalidation results ..... 27**

## Appendix A1: Description of trials – operable patients

Data on disease-free survival was available for 64% of the patients in the trials comparing CT vs. no CT and 84 % of the patients in the trials comparing RT + CT vs. RT (CT: chemotherapy, RT: radiotherapy).

| Trial                                           | Period of recruitment | Number of patients (in surrogate analysis) | Drugs used and dose per cycle (mg/m <sup>2</sup> )                                                                                                               | Radiotherapy dose (Gy) / fractions |
|-------------------------------------------------|-----------------------|--------------------------------------------|------------------------------------------------------------------------------------------------------------------------------------------------------------------|------------------------------------|
| <b>Operable NSCLC without post-operative RT</b> |                       |                                            |                                                                                                                                                                  |                                    |
| WJSG 3 <sup>A1-1</sup>                          | 1988-89               | 225 (224)                                  | Cisplatin 80 + Vindesine (2-3; once or twice), Mitomycin 8; 2 cycles<br>Tegafur + Uracil (400 total)<br>Daily treatment for 1 year                               | None                               |
| Mineo <sup>A1-2</sup>                           | 1988-94               | 66 (66)                                    | Cisplatin 100 + Etoposide 120<br>6 cycles                                                                                                                        | None                               |
| Xu <sup>A1-3</sup>                              | 1989-92               | 70 (70)                                    | Cisplatin 100 + Cyclophosphamide 300 + Vincristine 1-4 + Doxorubicin 50 + Lomustine 50<br>4 cycles<br>oral Tegafur (600-900 total)<br>Daily treatment for 1 year | None                               |
| Park1 <sup>A1-4</sup>                           | 1989-98               | 118 (118)                                  | Cisplatin 100 + Mitomycin C 10 + Vinblastine 6<br>3-4 cycles                                                                                                     | None                               |
| Park2 <sup>A1-5</sup>                           | 1989-98               | 108 (107)                                  | Cisplatin 100 + Mitomycin C 10 + Vinblastine 6<br>3-4 cycles                                                                                                     | None                               |
| ACTLC4A <sup>A1-6</sup>                         | 1992-95               | 208 (155)                                  | Cisplatin 80<br>1 cycles<br>Vindesine 3 (twice)<br>2 cycles<br>Tegafur + Uracil 400<br>Daily treatment for 2 years                                               | None                               |
| JLCRG <sup>A1-7</sup>                           | 1994-97               | 999 (999)                                  | Tegafur + Uracil 250 mg/m <sup>2</sup><br>Daily treatment for 2 years                                                                                            | None                               |
| ALPI1 <sup>A1-8</sup>                           | 1994-99               | 618 (618)                                  | Cisplatin 100 + Vindesine 3 + Mitomycin C 8<br>3 cycles                                                                                                          | None                               |
| JCOG 9304 <sup>A1-9</sup>                       | 1994-99               | 119 (119)                                  | Cisplatin 80 + Vindesine 3<br>3 cycles                                                                                                                           | None                               |
| ANITA1 <sup>A1-10</sup>                         | 1994-00               | 463 (463)                                  | Cisplatin 100 + Vinorelbine 30<br>4 cycles                                                                                                                       | None                               |
| JBR10 <sup>A1-11</sup>                          | 1994-01               | 482 (482)                                  | Cisplatin 50 + Vinorelbine 25<br>4 cycles                                                                                                                        | None                               |
| IALT1 <sup>A1-12</sup>                          | 1995-01               | 1001 (1001)                                | Cisplatin (80, 100, or 120) + Vindesine (3; weekly then twice weekly);<br>3-4 cycles                                                                             | None                               |
| IALT2 <sup>A1-12</sup>                          | 1995-01               | 294 (294)                                  | Cisplatin (80, 100, or 120), + Vinorelbine (30; weekly)<br>3-4 cycles                                                                                            | None                               |
| BLT1 <sup>A1-13</sup>                           | 1995-01               | 136 (136)                                  | Cisplatin 50 + Mitomycin 6 + vinblastine 6<br>or<br>Cisplatin 80 + Vindesine 6<br>3 cycles                                                                       | None                               |

|                                              |           |              |                                                                                                                                                                                       |                                                      |
|----------------------------------------------|-----------|--------------|---------------------------------------------------------------------------------------------------------------------------------------------------------------------------------------|------------------------------------------------------|
| BLT2 <sup>A1-13</sup>                        | 1995-01   | 65<br>(65)   | Cisplatin 50 + Mitomycin 6 + Ifosphamide 3<br>3 cycles                                                                                                                                | None                                                 |
| BLT3 <sup>A1-13</sup>                        | 1995-01   | 118<br>(118) | Cisplatin 50 + Mitomycin C 6 + Ifosphamide 3<br>3 cycles                                                                                                                              | None                                                 |
| CALGB<br>9633 <sup>A1-14</sup>               | 1996-2003 | 344<br>(344) | Carboplatin (6 mg/mL over 45-60 min) +<br>Paclitaxel 200<br>4 cycles                                                                                                                  | None                                                 |
| <b>Operable NSCLC with post-operative RT</b> |           |              |                                                                                                                                                                                       |                                                      |
| GETCB 01CB82 <sup>A1-15</sup>                | 1982-86   | 267<br>(267) | Cisplatin 75 + Doxorubicin 40 + Vincristine 1.2 +<br>Lomustine 80* alternating with<br>Cyclophosphamide 600<br>3 cycles                                                               | 60-65 / 30-33<br>After chemotherapy                  |
| EORTC<br>08861 <sup>unpublished</sup>        | 1986-90   | 24<br>(24)   | Cisplatin 100 + Vindesine 6<br>4 cycles                                                                                                                                               | 56 / 28<br>After 2 cycles<br>Concurrent for 2 cycles |
| Int 0115 <sup>A1-16</sup>                    | 1991-97   | 488<br>(488) | Cisplatin 60 + Etoposide 120*3<br>4 cycles                                                                                                                                            | 50.4 / 28<br>Concurrent                              |
| ALPI3 <sup>A1-8</sup>                        | 1994-99   | 470<br>(470) | Cisplatin 100 + Vindesine 3*2 + Mitomycin 8<br>3 cycles                                                                                                                               | 50-54 / 25-27<br>After chemotherapy                  |
| ANITA3 <sup>A1-10</sup>                      | 1994-00   | 377<br>(377) | Cisplatin 100 + Vinorelbine 30*4<br>4 cycles                                                                                                                                          | 45-60 / 23-30<br>After chemotherapy                  |
| BLT4 <sup>A1-13</sup>                        | 1995-01   | 49<br>(49)   | MIC: Cisplatin 50, Mitomycin 6, Ifosfamide 3<br>MVP: Cisplatin 50, Mitomycin 6,<br>Vinblastine 6<br>CV: Cisplatin 80, Vindesine 3*2<br>NP: Cisplatin 80, Vinorelbine 30*2<br>3 cycles | 40-60 / 15-30<br>After chemotherapy                  |
| IALT3-4 <sup>A1-12</sup>                     | 1995-01   | 572<br>(572) | Cisplatin 80, 100 or 120 + Vindesine 3*2<br>N=16<br>or Vinblastine 4*2 N=119<br>or Vinorelbine 30 weekly N=206<br>or Etoposid 30*3 N=231<br>3 or 4 cycles                             | ≤60<br>After chemotherapy                            |

\* Total dose

ACTLC: Study Group of Adjuvant Chemotherapy for Lung Cancer. ALPI: Adjuvant Lung Cancer Project Italy. ANITA: Adjuvant Navelbine International Trialist Association. BLT: Big Lung Trial. CALGB: Cancer and Leukemia Group B. EORTC: European Organization for Research and Treatment of Cancer. GETCB : Groupe d'Etude et de Traitement des Cancers Bronchiques. IALT: International Adjuvant Lung Trial. Int = US intergroup trial. JBR10: National Cancer Institute of Canada Clinical Trial Group trial JBR10. JCOG: Japan Clinical Oncology Group. JLCRG: Japan Lung Cancer Research Group. WJSG: West Japan Study Group for Lung Cancer Surgery.

Gy: Grays; NSCLC: non-small cell lung cancer; RT: radiotherapy

1. Wada H et al. West Japan Study Group for lung cancer surgery. Post-operative adjuvant chemotherapy with PVM (cisplatin + vindesine + mitomycin c) and UFT (uracil and tegafur) in resected stage I-II NSCLC (non-small cell lung cancer): a randomised clinical trial. *Eur J Cardiothorac Surg* 1999; 15: 438-43.
2. Mineo TC, Ambrogi V, Corsaro V, Roselli M. Postoperative adjuvant therapy for stage IB non-small cell lung cancer. *Eur J Cardiothorac Surg* 2001; 20: 378-84.
3. Xu G, Rong T, Lin P. Adjuvant chemotherapy following radical surgery for non-small cell lung cancer: a randomized study. *Zhonghua Zhong Liu Za Zhi* 1998; 20: 228-30.
4. Park JH, Lee C-T, Lee HW, Baek HJ, Zo JI, Shim YM. Postoperative adjuvant chemotherapy for stage I non-small cell lung cancer. *Eur J Cardiothorac Surg* 2005; 27: 1086-91.
5. Park JH. Postoperative adjuvant therapy for stage IIIA non-small cell lung cancer. *J Thorac Oncol* 2007; 2 (suppl): S651.
6. Imaizumi M. Postoperative adjuvant cisplatin, vindesine, plus uracil-tegafur chemotherapy increased survival of patients with completely resected p-stage I non-small cell lung cancer. *Lung Cancer* 2005; 49: 85-94.
7. Kato H, Ichinose Y, Ohta M, et al. A randomised trial of adjuvant chemotherapy with uracil-tegafur for adenocarcinoma of the lung. *N Engl J Med* 2004; 350: 1713-21.

8. Scagliotti GV, Fossati R, Torri V, et al. Randomized study of adjuvant chemotherapy for completely resected stage I, II or IIIa non-small cell lung cancer. *J Natl Cancer Inst* 2003; 95: 1453–61.
9. Tada H, Tsuchiya R, Ichinose Y, et al. A randomized trial comparing adjuvant chemotherapy versus surgery alone for completely resected pN2 non-small cell lung cancer (JCOG 9304). *Lung Cancer* 2004; 43: 167–73.
10. Douillard JY, Rosell R, De Lena M, et al. Adjuvant vinorelbine plus cisplatin versus observation in patients with completely resected stage IB–IIIA non-small-cell lung cancer (Adjuvant Navelbine International Trialist Association [ANITA]): a randomised controlled trial. *Lancet Oncol* 2006; 7: 719–27.
11. Winton T, Livingston R, Johnson D, et al. Vinorelbine plus cisplatin vs observation in resected non-small cell lung cancer. *N Engl J Med* 2005; 352: 2589–97.
12. The International Adjuvant Lung Cancer Trial Collaborative Group. Cisplatin-based adjuvant chemotherapy in patients with completely resected non-small cell lung cancer. *N Engl J Med* 2004; 350: 351–60.
13. Waller D, Peake MD, Stephens RJ, et al. Chemotherapy for patients with non-small cell lung cancer: the surgical setting of the Big Lung Trial. *Eur J Cardiothorac Surg* 2004; 26: 173–82.
14. Strauss GM, Herndon JE 2nd, Maddaus MA, et al. Adjuvant paclitaxel plus carboplatin compared with observation in stage IB non-small-cell lung cancer: CALGB 9633 with the Cancer and Leukemia Group B, Radiation Therapy Oncology Group, and North Central Cancer Treatment Group Study Groups. *J Clin Oncol* 2008; 26: 5043–51.
15. Dautzenberg B, Chastang C, Arriagada R, Le Chevalier T, Belpomme D, Hurdebourcq M et al. Adjuvant radiotherapy versus combined sequential chemotherapy followed by radiotherapy in the treatment of resected non-small cell lung cancer. *Cancer* 1995; 76:779-786.

## Appendix A2: Description of trials – locally advanced patients, sequential CT

Data on progression-free survival was available for 37% of the patients in the trials comparing RT + Sequential CT vs. RT.

| Trial                                    | Period of recruitment | Number of patients (in surrogate analysis) | Drugs used and dose per cycle (mg/m <sup>2</sup> )                                                                                       | Radiotherapy dose (Gy) / fractions                                             |
|------------------------------------------|-----------------------|--------------------------------------------|------------------------------------------------------------------------------------------------------------------------------------------|--------------------------------------------------------------------------------|
| CALGB 8433 <sup>A2-1</sup>               | 1984-87               | 180 (180)                                  | Cisplatin 100 + Vinblastine 5<br>2 cycles ; neo-adjuvant                                                                                 | 60 Gy, 2 Gy/f, 6-7 W                                                           |
| EORTC 08842 <sup>A2-2</sup>              | 1984-89               | 75 (73)                                    | Cisplatin 100 + Vindesine 3<br>2 cycles ; neo-adjuvant + alternated                                                                      | 55 Gy, 20 f                                                                    |
| CEBI 138 <sup>A2-3</sup>                 | 1983-89               | 353 (353)                                  | Cisplatin 100 + Cyclophosphamide 200 + Vindesine 1.5 + Lomustine 50<br>3 cycles (+ 3 cycles if no progression) ; neo-adjuvant + adjuvant | 65 Gy, 26 f, 45 D                                                              |
| RTOG 8808 – ECOG 4588 <sup>A2-4</sup>    | 1989-92               | 326 (326)                                  | Cisplatin 100 + Vinblastine<br>neo-adjuvant                                                                                              | 60 Gy, 2 Gy/f, 6W                                                              |
| BLT adjuvant <sup>A2-5</sup>             | 1995-01               | 119 adjuvant (119)                         | Cisplatin 50 + Mitomycin C 6 + Ifosfamide 3<br>or Cisplatin 50 + Mitomycin C 6 + Vinblastine 6                                           | not standardized, followed local practice                                      |
| BLT neoadjuvant <sup>A2-5</sup>          |                       | 169 neoadjuvant (169)                      | or Cisplatin 80 + Vindesine 3<br>or Cisplatin 80 + Vinorelbine 30<br>3 cycles ; adjuvant or neo-adjuvant                                 |                                                                                |
| GMMA Ankara 1995 <sup>A2-6</sup>         | 1995-96               | 30 (30)                                    | Cisplatin 40 + Etoposide 200 + Ifosfamide 200<br>2 cycles ; neo-adjuvant                                                                 | 36 Gy 12 f, split course 7 D free, 12.5 Gy 5 f                                 |
| Taxane Only<br>Tax SI009 <sup>A2-7</sup> | 1995-99               | 208 (208)                                  | Docetaxel 100<br>maximum of 3 cycles ; neo-adjuvant                                                                                      | Local treatment (surgery or radiotherapy) decided at baseline by the clinician |

BLT: Big Lung Trial. CALGB: Cancer and Leukemia Group B. CEBI: Carcinome épidermoïde bronchique inopérable. ECOG: Eastern Cooperative Oncology Group. EORTC: European Organisation for Research and Treatment of Cancer. GMMA: Gülhane Military Medicine Academy. RTOG: Radiotherapy Oncology Group. Tax: Taxotere. D: days. f: fractions. Gy: Grays. W: weeks.

1. Dillman R, Seagren S, Propert K et al. A randomised trial of induction chemotherapy plus high-dose radiation versus radiation alone in stage III non-small cell lung cancer. *N Engl J Med* 1990; 323:940-5.
2. Planting A, Helle P, Drings P et al. A randomized study of high-dose split course radiotherapy preceded by high-dose chemotherapy versus high-dose radiotherapy only in locally advanced non-small cell lung cancer. *Ann Oncol* 1996; 7:139-44.
3. Le Chevalier T, Arriagada R, Quoix E et al. Radiotherapy alone versus combined chemotherapy and radiotherapy in nonresectable non-small cell lung cancer: First analysis of a randomized trial in 353 patients. *J Natl Cancer Inst* 1991; 83(6):417-23.
4. Sause W, Kolesar P, Taylor IV S et al. Final results of phase III trial in regionally advanced unresectable non-small cell lung cancer. *Chest* 2000; 117:358-64.
5. Fairlamb D, Milroy R, Gower N, Parmar M, Peake M, Rudd R, Souhami R, Spiro S, Stephens R, Waller D. A randomised comparison of radical radiotherapy with or without chemotherapy for patients with non-small lung cancer: results from the Big Lung Trial. *Radiother Oncol.* 2005 ;75:134-40.
6. Ulutin HC, Güden M, Oysul K et al. Split-course radiotherapy with or without concurrent or sequential chemotherapy in non-small cell lung cancer. *Radiat Med* 2000; 18:93-96.
7. Mattson K, Abratt R, ten Velde G et al. Docetaxel as neoadjuvant therapy for radically treatable stage III non-small cell lung cancer: a multinational randomised phase III study. *Ann Oncol* 2003;14:116-22.



## Appendix A3: Description of trials – locally advanced patients, concurrent CT

Data on progression-free survival was available for 85% of the patients in the trials comparing RT + Concurrent CT vs. RT.

| Trial                            | Period of recruitment | Number of patients (in surrogate analysis) | Drugs used and dose per cycle (mg/m <sup>2</sup> )                                     | Radiotherapy dose (Gy) / fractions              |
|----------------------------------|-----------------------|--------------------------------------------|----------------------------------------------------------------------------------------|-------------------------------------------------|
| EORTC 08844 <sup>A3-1</sup>      | 1984-89               | 331 (331)                                  | Arm 2 : Cisplatin 30 – 4 cycles<br>Arm 3: Cisplatin 6 daily x 20                       | 55 Gy, 20 f, 7 W                                |
| PMCI 88 C091 <sup>A3-2</sup>     | 1989-95               | 208 (208)                                  | Arm 3: Carboplatin 70<br>Arm 4: Carboplatin 70                                         | 60 Gy, 30 f, 3 (tid) or 6 W                     |
| CALGB-ECOG <sup>A3-3</sup>       | 1991-94               | 282 (282)                                  | Carboplatin 100 – 6 cycles                                                             | 60 Gy, 30 f, 6 W                                |
| NKB-CKVO 9411 <sup>A3-4</sup>    | 1994-98               | 160 (159)                                  | Carboplatin 840 ci during 6 weeks                                                      | 60 Gy, 30 f, 6 W                                |
| NPC IIIB 96-01 <sup>A3-5</sup>   | 1996-2003             | 584 (580)                                  | Carboplatin 15 daily x 33<br>Induction CT in both arms                                 | 66 Gy, 33 f, 6 W                                |
| GMMA Ankara 1995 <sup>A2-6</sup> | 1995-96               | 30 (30)                                    | Cisplatin 6 daily                                                                      | 48.5 Gy, 17 f, sc                               |
| JCOG 9812 <sup>A3-6</sup>        | 1999-01               | 46 (46)                                    | Carboplatin 30 daily x 20                                                              | 60 Gy, 30 f, 6 W                                |
| Kragujevac 88 <sup>A3-7</sup>    | 1988-89               | 169 (169)                                  | Carboplatin 100 + Etoposide 100 Arm II : Weekly<br>Arm III : 3 cycles                  | 64.8 Gy, 54 f bid, 5.4 W                        |
| Kragujevac 90 <sup>A3-8</sup>    | 1990-91               | 131 (131)                                  | Carboplatin 50 + Etoposide 50                                                          | 69.6 Gy, 58 f bid, 5.8 W                        |
| NCCTG 90 24 51 <sup>A3-9</sup>   | 1992-93               | 74 (74)                                    | Cisplatin 30 + Etoposide 100                                                           | 60 Gy, 40 f bid, 4 W sc                         |
| LAMP ACR 427 <sup>A3-10</sup>    | 1998-2001             | 177 (174)                                  | Carboplatin AUC2 + Paclitaxel 45 mg/m <sup>2</sup> weekly<br>Induction CT in both arms | 63 Gy, 34 f, 7 W                                |
| Uludag <sup>A3-11</sup>          | 1996-2001             | 45 (45)                                    | Paclitaxel 30-60                                                                       | RT: 59.4 Gy, 1.8 Gy/f<br>RT-CT: 63 Gy, 1.8 Gy/f |
| GMMA Ankara 97 <sup>A3-12</sup>  | 1995-96               | 51 (51)                                    | Paclitaxel 60                                                                          | 48.5 Gy, 17 f, sc                               |
| Brocat Study Group CT/RT 99/97   | 1997-2002             | 212 (212)                                  | Paclitaxel 60                                                                          | 60-66 Gy, 30-33 fr                              |
| TAX 206 trial                    | 1999-2001             | 89 (60)                                    | Docetaxel 20                                                                           | 60 Gy, 30 fr                                    |

CALGB: Cancer and Leukemia Group B. ECOG: Eastern Cooperative Oncology Group. EORTC: European Organisation for Research and Treatment of Cancer. GMMA: Gülhane Military Medicine Academy. JCOG: Japan Clinical Oncology Group. LAMP ACR: Locally Advanced Multi-Modality Protocol American College of Radiology. NCCTG: North Central Cancer Treatment Group. NKB-CKVO: Nederlandse Kanker Bestrijding – Commissie voor Klinisch Vergelijkend Onderzoek. NPC IIIB: Non Petites Cellules stage IIIB. PMCI: Peter MacCallum Cancer Institute. TAX: Taxotere. AUC: area under the curve. bid: two fractions per day. ci: continuous infusion. CT: chemotherapy. f: fractions. Gy: Grays. sc: split course. tid: three fractions per day. W: weeks.

- Schaake-Koning C et al. Effects of concomitant cisplatin and radiotherapy on inoperable non small cell lung cancer. *N Engl J Med* 1992; 326: 524-30.
- Ball D et al. A randomised phase III study of accelerated or standard fraction radiotherapy with or without concurrent carboplatin in inoperable non-small cell lung cancer: final report of an Australian multi-centre trial. *Radiother Oncol* 1999; 52: 129-36.
- Clamon G et al. Radiosensitization with carboplatin for patients with unresectable stage III non small cell lung cancer : a phase III trial of the Cancer and Leukemia Group B and the Eastern Cooperative Oncology Group. *J Clin Oncol* 1999; 17:4-11.
- Groen H et al. Continuously infused carboplatin used as radiosensitizer in locally unresectable non-small-cell lung cancer: a multicenter phase III study. *Ann Oncol* 2004; 15: 427-432.

5. Douillard J et al. Randomized phase III trial for stage III unresectable non small cell lung cancer: induction chemotherapy [vinorelbine-cisplatin] followed by conventional radiation without or with daily carboplatin. Final results. Study CRG/BMS/NPC/96 of the French Lung Cancer Study Group FNCLCC and IFCT. Proceedings of the 11th World Conference on Lung Cancer. Barcelona 2005; S16:O-040.
6. Shinji Atagi et al. Standard Thoracic Radiotherapy With or Without Concurrent Daily Low-dose Carboplatin in Elderly Patients with Locally Advanced Non-small Cell Lung Cancer: a Phase III Trial of the Japan Clinical Oncology Group (JCOG9812). *Jpn J Clin Oncol* 2005; 35(4):195-201.
7. Jeremic B et al Randomized trial of hyperfractionated radiation therapy with or without concurrent chemotherapy for stage III non small cell lung cancer. *J Clin Oncol* 1995; 13:452-8.
8. Jeremic B et al. Hyperfractionated radiation therapy with or without concurrent low-dose daily carboplatin/etoposide for non small cell lung cancer: a randomized study. *J Clin Oncol* 1996; 14:1065-70.
9. Bonner J et al. The possible advantage of hyperfractionated thoracic radiotherapy in the treatment of locally advanced non small cell lung cancer. Results of a North Central Cancer Treatment Group phase III study. *Cancer* 1998; 82:1037-48.
10. Belani CP et al. Combined Chemoradiotherapy Regimens of Paclitaxel and Carboplatin for Locally Advanced Non-Small-Cell Lung Cancer: A Randomized Phase II Locally Advanced Multi-Modality Protocol. *J Clin Oncol* 2005; 23:5883-91.
11. Sarihan S et al. Randomized phase II study of radiotherapy alone versus radiotherapy with paclitaxel in non-small cell lung cancer. *J Int Med Res* 2004; 32:375-83.
12. Ulutin HC, Pak Y. Preliminary results of radiotherapy with or without weekly paclitaxel in locally advanced non-small cell lung cancer. *J Cancer Res Clin Oncol* 2003; 129:52-6.

## Appendix A4: Description of trials – locally advanced patients, sequential versus concurrent CT

Data on progression-free survival was available for 100% of the patients in the trials comparing RT + Sequential CT vs. RT + Concurrent CT.

| Trial                               | Period of recruitment | Number of patients (in surrogate analysis) | Comments                                              | Randomised chemotherapy                                                                             | Radiotherapy       |
|-------------------------------------|-----------------------|--------------------------------------------|-------------------------------------------------------|-----------------------------------------------------------------------------------------------------|--------------------|
| WJLCG <sup>A4-1</sup>               | 1992-94               | 314 (313)                                  | Unresectable stage III neoadjuvant vs concurrent      | Cisplatin 80 + Vindesine 3 + Mitomycin C 8                                                          | 56 Gy, 28 f        |
| RTOG 9410 <sup>A4-2</sup>           | 1994-98               | 407 (407)                                  | neoadjuvant vs concurrent                             | Cisplatin 100 + Vinblastine 5 5 cycles                                                              | 60 Gy              |
| GLOT-GFPC NPC 95-01 <sup>A4-3</sup> | 1996-2000             | 205 (202)                                  | IIIA N2, IIIB neoadjuvant vs concurrent+ adjuvant     | Cisplatin 120 + Vinorelbine 30 versus Cisplatin 20 + Etoposide 50 then Cisplatin 80+ Vinorelbine 30 | 66 Gy, 33 f, 6.5 W |
| EORTC 08972 <sup>A4-4</sup>         | 1999-2003             | 158 (158)                                  | Inoperable stage I, II, III neoadjuvant vs concurrent | 2 cycles : Cisplatin 75 + Gemcitabine 1250 – 2 cycles versus Cisplatin 6 daily                      | 66 Gy, 24 f, 32 D  |
| CALGB 8831 <sup>A4-5</sup>          | 1988-1989             | 91 (91)                                    | Adjuvant vs concurrent                                | Cisplatin 100 + Vinblastine 5 4 cycles versus Carboplatin 100 – 6 cycles                            | 60 Gy, 2 Gy/f, 6 W |
| GMMA Ankara 1995 <sup>A2-6</sup>    | 1995-96               | 30 (30)                                    | arm 2 vs 3 neoadjuvant vs concurrent                  | Cisplatin 40 + Etoposide 200 + Ifosfamide 200 – 2 cycles vs Cisplatin 6 daily                       | 48.5 Gy, 17 f, sc  |

CALGB: Cancer and Leukemia Group B. EORTC: European Organisation for Research and Treatment of Cancer. GMMA: Gülhane Military Medicine Academy. GLOT-GFPC NPC: Groupe Lyon-Saint-Etienne d'Oncologie Thoracique–Groupe Français Non Petites Cellules. RTOG: Radiotherapy Oncology Group. WJLCG: West Japan Lung Cancer Group. D: days. f: fractions. Gy: Grays. sc: split course. W: weeks.

1. Furuse K, Fukuoka M, Kawahara M et al. Phase III study of concurrent versus sequential thoracic radiotherapy in combination with mitomycin, vindesine, and cisplatin in unresectable stage III non-small cell lung cancer. *J Clin Oncol* 1999; 17:2692-9.
2. Curran W, Scott C, Langer C et al. Long-term benefit is observed in a phase III comparison of sequential versus concurrent chemo-radiation for patients with unresected stage III NSCLC: RTOG 9410. *Proceedings of ASCO* 2003; 22:621.
3. Fournel P, Robinet G, Thomas P et al. Randomized Phase III Trial of Sequential Chemoradiotherapy Compared With Concurrent Chemoradiotherapy in Locally Advanced Non-Small-Cell Lung Cancer: Groupe Lyon-Saint-Etienne d'Oncologie Thoracique-Groupe Français de Pneumo-Cancérologie NPC 95-01 Study. *J Clin Oncol* 2005; 23:5910-7.
4. Belderbos J, Uitterhoeve L, van Zandwijk N et al. on behalf of the EORTC LCG and RT Group. Randomised trial of sequential versus concurrent chemo-radiotherapy in patients with inoperable non-small cell lung cancer (EORTC 08972-22973). *Eur J Cancer* 2007; 43:114-21.
5. Clamon G, Herndon J, Eaton W et al. A feasibility study of extended chemotherapy for locally advanced non-small cell lung cancer: a phase II trial of Cancer and Leukemia Group B. *Cancer Invest* 1994; 12:273-282.

## Appendix A5: Description of trials – radiotherapy trials

Data on progression-free survival was available for 100% of the patients the trials in the MAR-LC meta-analysis.

| Trial                                   | Period of recruitment | Number of patients (in surrogate analysis) | Chemotherapy                                                                                       | Randomised radiotherapy                                                        |
|-----------------------------------------|-----------------------|--------------------------------------------|----------------------------------------------------------------------------------------------------|--------------------------------------------------------------------------------|
| ECOG 3588 <sup>A5-1,*</sup>             | 1989-1992             | 417 (417)                                  | Cisplatin 60 mg/m <sup>2</sup> d1<br>Etoposide 120 mg/m <sup>2</sup> d1,2,3<br>4 cycles (3 w)      | Standard: 45 Gy / 25 f / 5 w<br>Experimental: 45 Gy / 30 f / 3 w bid           |
| NCCTG 892052 <sup>A5-2,*</sup>          | 1990-1996             | 268 (268)                                  | Cisplatin 30 mg/m <sup>2</sup> d1,2,3<br>Etoposide 130 mg/m <sup>2</sup> d1,2,3<br>6 cycles‡ (4 w) | Standard: 50.4 Gy / 28 f / 5.5 w<br>Experimental: 48 Gy / 32 f / 5.5 w sc* bid |
| RTOG 8808-<br>ECOG 4588 <sup>A2-4</sup> | 1989-1992             | 326 (326)                                  | None                                                                                               | Standard: 60 Gy / 30 f / 6 w<br>Experimental: 69.6 Gy / 58 f / 6 w bid         |
| PMCI 88C091 <sup>A3-2</sup>             | 1989-1995             | 101 (101)                                  | None                                                                                               | Standard: 60 Gy / 30 f / 6 w<br>Experimental: 60 Gy / 30 f / 3 w bid           |
| PMCI 88C091 CT <sup>A3-2</sup>          | 1989-1995             | 107 (107)                                  | Carboplatin 70 mg/m <sup>2</sup> d1-5<br>+ Carboplatin 70 mg/m <sup>2</sup> d29-33 in standard arm | Standard: 60 Gy / 30 f / 6 w<br>Experimental: 60 Gy / 30 f / 3 w bid           |
| CHART <sup>A5-3</sup>                   | 1990-1995             | 563 (563)                                  | None                                                                                               | Standard: 60 Gy / 30 f / 6 w<br>Experimental: 54 Gy / 36 f / 1.5 tid           |
| NCCTG 902451 <sup>A3-9</sup>            | 1992-1993             | 74 (74)                                    | None                                                                                               | Standard: 60 Gy / 30 f / 6 w<br>Experimental: 60 Gy / 40 f / 6 w sc bid        |
| NCCTG 942452 <sup>A5-4</sup>            | 1994-1999             | 246 (246)                                  | Cisplatin 30 mg/m <sup>2</sup> d1-3;28-30<br>Etoposide 100 mg/m <sup>2</sup> d1-3;28-30            | Standard: 60 Gy / 30 f / 6 w<br>Experimental: 60 Gy / 40 f / 6 w sc bid        |
| ECOG 2597 <sup>A5-5</sup>               | 1998-2001             | 119 (119)                                  | Carboplatin AUC 6 d1<br>Paclitaxel 225 mg/m <sup>2</sup> d1<br>2 cycles£ (3 w)                     | Standard: 64 Gy / 32 f / 6.5 w<br>Experimental: 57.6 Gy / 36 f / 2.5 w tid     |
| Gliwice 2001 <sup>A5-6</sup>            | 2001-2006             | 58 (58)                                    | None                                                                                               | Standard: 72 Gy / 40 f / 8 w<br>Experimental: 72 Gy / 40 f / 5.5 w             |
| CHARTWEL <sup>A5-7</sup>                | 1997-2005             | 300 (300)                                  | None                                                                                               | Standard: 66 Gy / 33 f / 6.5 w<br>Experimental: 60 Gy / 40 f / 2.5 w tid       |
| CHARTWEL CT <sup>A5-7</sup>             | 1997-2005             | 106 (106)                                  | Neoadjuvant CT - depends on centres                                                                | Standard: 66 Gy / 33 f / 6.5 w<br>Experimental: 60 Gy / 40 f / 2.5 w tid       |

\*: small-cell lung cancer trials.

CHART, Continuous Hyperfractionated Accelerated Radiation Therapy; CHARTWEL, CHART Week-End Less; ECOG, Eastern Cooperative Oncology Group; EORTC: European Organisation for Research and Treatment of Cancer. NCCTG, North Central Cancer Treatment Group; PCMI, Peter MacCallum Institute; RTOG, Radiation Therapy Oncology Group.

AUC: area under the curve. bid: two fractions per day. d: day. f: fractions. Gy: Grays. tid: three fractions per day. w: weeks. sc: split course. NSCLC: non-small-cell lung cancer.

1. Turrisi AT, Kim K, Blum R, Sause WT, Livingston RB, Komaki R, Wagner H, Aisner S, Johnson DH. Twice-daily compared with once-daily thoracic radiotherapy in limited small-cell lung cancer treated concurrently with cisplatin and etoposide. *N Engl J Med* 1999; 340:265-271.
2. Schild SE, Bonner JA, Shanahan TG, Brooks BJ, Marks RS, Geyer SM, Hillman SL, Farr GH, Tazelaar HD, Krook JE, Geoffroy FJ, Salim M, Arusell RM, Mailliard JA, Schaefer PL, Jett JR. Long-term results of a phase III trial comparing once-daily radiotherapy with twice-daily radiotherapy in limited-stage small-cell lung cancer. *Int J Radiat Oncol Biol Phys* 2004; 59:943-951.

3. 5. Saunders M, Dische S, Barrett A, Harvey A, Griffiths G, Parmar M. Continuous, hyperfractionated, accelerated radiotherapy (CHART) versus conventional radiotherapy in non-small cell lung cancer: Mature data from the randomised multicentre trial. *Radiother Oncol* 1999; 52:137-148.
4. Schild SE, Stella PJ, Geyer SM, Bonner JA, Marks RS, McGinnis WL, Goetz SP, Kuross SA, Mailliard JA, Kugler JW, Shaefer PL, Rett JR. Phase III trial comparing chemotherapy plus once-daily or twice-daily radiotherapy in stage III non-small-cell lung cancer. *Int J Radiat Oncol Biol Phys* 2002; 54:370-378.
5. Belani CP, Wang W, Johnson DH, Wagner H, Schiller J, Veeder M, Mehta M. Phase III study of the Eastern Cooperative Oncology Group (ECOG 2597): induction chemotherapy followed by either standard thoracic radiotherapy or hyperfractionated accelerated radiotherapy for patients with unresectable stage IIIA and B non-small-cell lung cancer. *J Clin Oncol* 2005; 23:3760-3767.
6. Zajusz A, Behrendt K, Nowicka E, Plewicki G, Gawkowska-Suwinska M, Giglok M, Smolska B. Early results of continuous accelerated radiotherapy (CAIR) for LA-NSCLC patients. *Radiother Oncol* 2006; 81(Suppl 1):S386. [Poster]
7. Baumann M, Herrmann T, Koch R, et al, on behalf of the CHARTWEL-bronchus group. Final results of the randomized phase III CHARTWEL-trial (ARO 97-1) comparing hyperfractionated-accelerated vs conventionally fractionated radiotherapy in non-small cell lung cancer (NSCLC). *Eur J Cancer* 2009; Supplements 7(3): 4.

---

**Appendix A6: Cumulative percentage of DFS/PFS events**

---

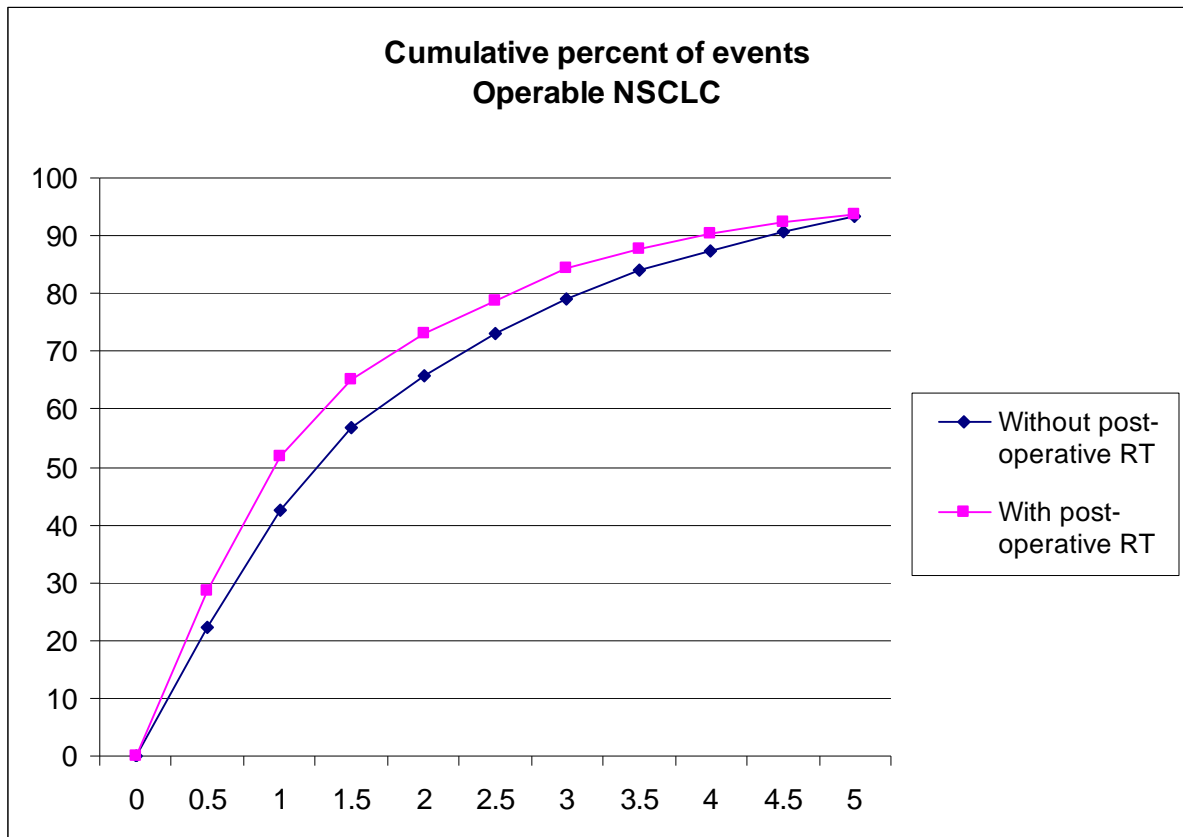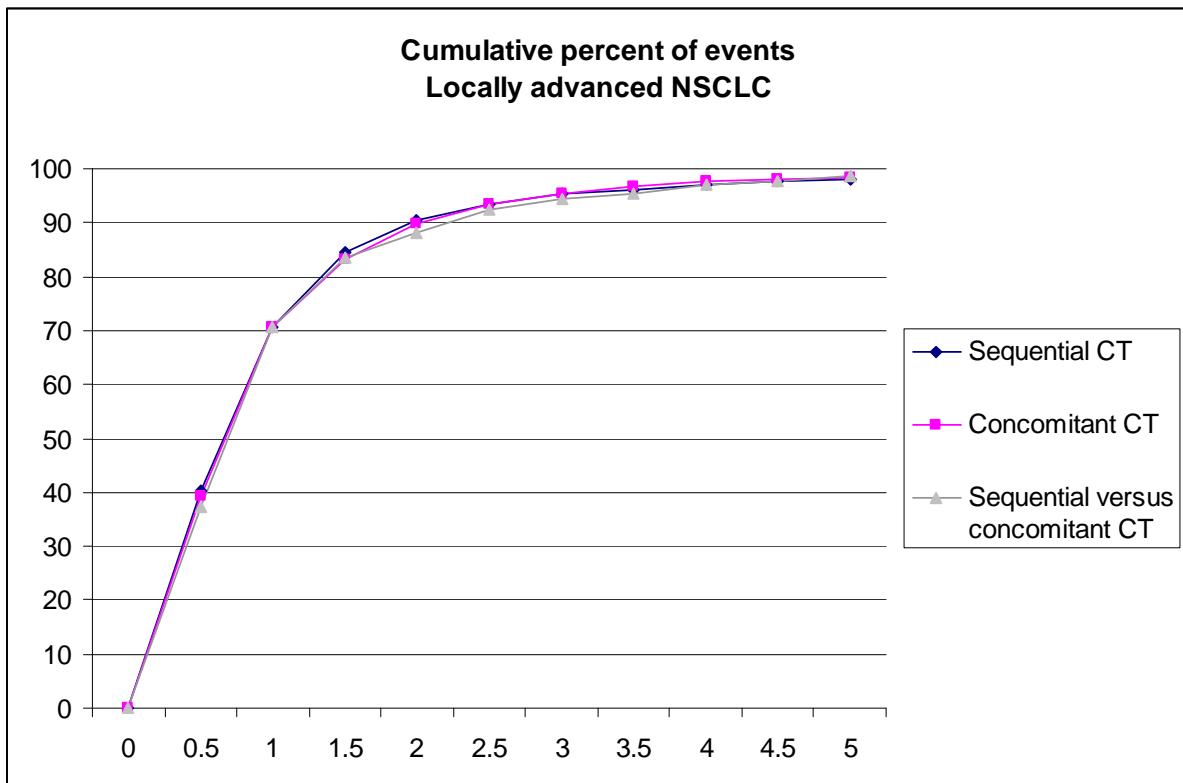

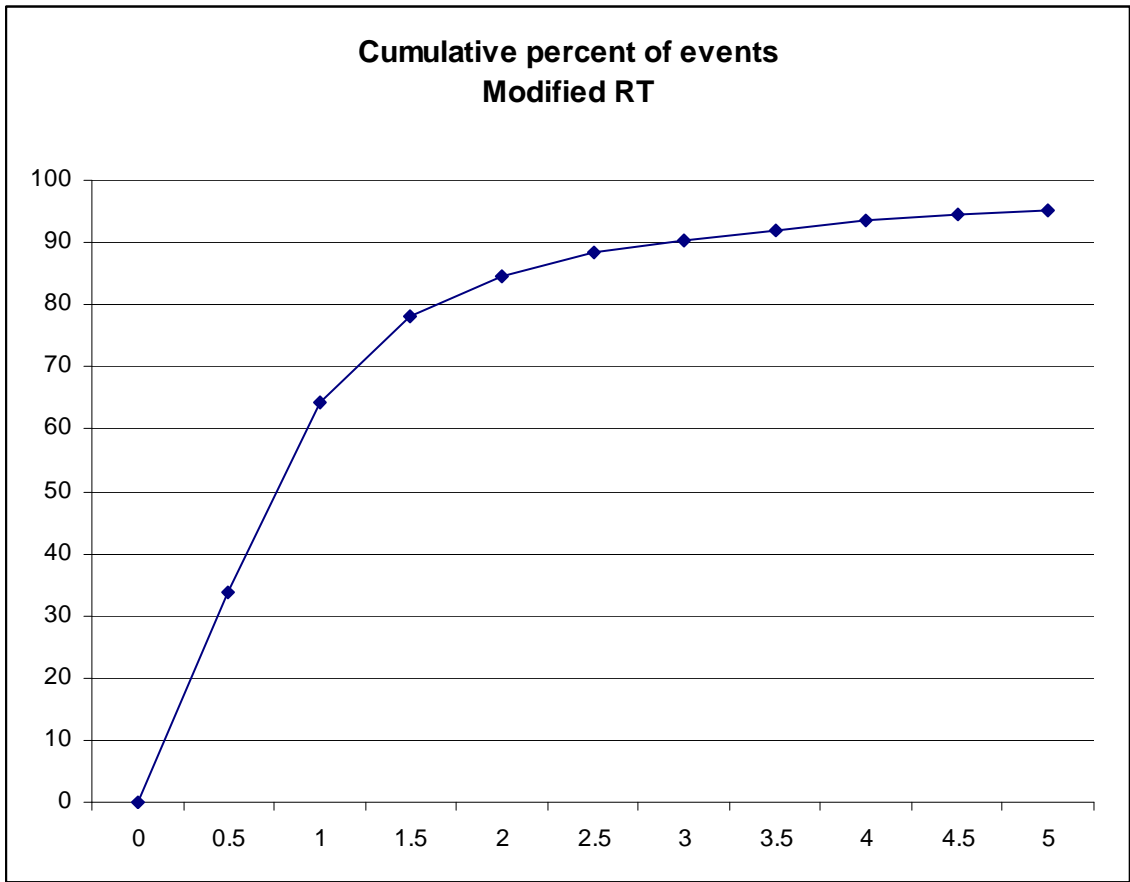

## Appendix A7: Summary of data

**Table 1: Description of analyzed data in operable NSCLC**

|                                     | Patients<br>(trials) | Any events |                          |                                                      | Deaths |                          |
|-------------------------------------|----------------------|------------|--------------------------|------------------------------------------------------|--------|--------------------------|
|                                     |                      | N          | % in<br>first 3<br>years | %<br>deaths<br>in<br>events*<br>(near <sup>o</sup> ) | N      | % in<br>first 5<br>years |
| Operable non-small cell lung cancer |                      |            |                          |                                                      |        |                          |
| Without radiotherapy                | 5 379 (17)           | 2 525      | 79%                      | 25%<br>(26%)                                         | 2 163  | 91%                      |
| With radiotherapy                   | 2 247 (7)            | 1 673      | 84%                      | 29%<br>(30%)                                         | 1 566  | 92%                      |

\*day of event=day of death

<sup>o</sup>near: day of death-day of event <= 7 days.

**Table 2: Description of analyzed data in locally advanced lung cancer**

|                                              | Patients<br>(trials) | Locoregional<br>events |                       | Any events |                       |                             | Deaths |                       |
|----------------------------------------------|----------------------|------------------------|-----------------------|------------|-----------------------|-----------------------------|--------|-----------------------|
|                                              |                      | N                      | % in first<br>2 years | N          | % in first<br>2 years | % deaths<br>in<br>events    | N      | % in first<br>5 years |
| Locally advanced non-small cell lung cancer  |                      |                        |                       |            |                       |                             |        |                       |
| Sequential chemotherapy                      | 1 458 (8)            | -                      | -                     | 1 375      | 90%                   | 30%*<br>(33% <sup>o</sup> ) | 1 333  | 97%                   |
| Concurrent chemotherapy                      | 2 552 (15)           | 744                    | 90%                   | 2 391      | 90%                   | 25%<br>(27%)                | 2 305  | 98%                   |
| Sequential versus concurrent<br>chemotherapy | 1 201 (6)            | -                      | -                     | 1 094      | 88%                   | 23%<br>(26%)                | 1 065  | 97%                   |
| Locally advanced lung cancer<br>Radiotherapy | 2 685 (12)           | 894                    | 86%                   | 2 562      | 85%                   | 27%<br>(33%)                | 2 471  | 94%                   |

\*day of event=day of death

<sup>o</sup>near: day of death - day of event <= 7 days.



**Table 3: Follow-up and survival times**

| <b>Meta-analysis</b>                      | <b>Median of follow-up (range)</b> | <b>Median of overall survival (range)</b> | <b>Median of disease-free / progression-free survival (range)</b> | <b>Median of duration of loco-regional control (range)</b> |
|-------------------------------------------|------------------------------------|-------------------------------------------|-------------------------------------------------------------------|------------------------------------------------------------|
| <b>Operable NSCLC</b>                     |                                    |                                           |                                                                   |                                                            |
| Without radiotherapy                      | 5.7 y<br>(0-16.7 y)                | 8.2 y<br>(4 d -16.7 y)                    | 6.4 y<br>(0-16.7 y)                                               |                                                            |
| With radiotherapy                         | 6.4 y<br>(1 d – 22.2 y)            | 2.5 y<br>(1 d – 22.2 y)                   | 1.6 y<br>(1 d – 22.2 y)                                           |                                                            |
| <b>Locally advanced NSCLC</b>             |                                    |                                           |                                                                   |                                                            |
| Sequential chemotherapy                   | 6.8 y<br>(0-17.8 y)                | 11.7 m<br>(3 d -17.8 y)                   | 7.9 m<br>(0 -17.8 y)                                              |                                                            |
| Concurrent chemotherapy                   | 5.2 y<br>(0-15.8 y)                | 14.1 m<br>(0-15.8 y)                      | 8.1 m<br>(0-15.8 y)                                               | 21.0 m*<br>(3 d -15.8 y)                                   |
| Sequential versus concurrent chemotherapy | 6.1 y<br>(0-11.2 y)                | 14.6 m<br>(4 d – 11.2 y)                  | 8.3 m<br>(1 d – 11.2 y)                                           |                                                            |
| Locally advanced lung cancer              |                                    |                                           |                                                                   |                                                            |
| Radiotherapy                              | 8.6 y<br>(0 – 14.3 y)              | 15.0 m<br>(0 – 14.3 y)                    | 9.1 m<br>(0 – 14.3 y)                                             | 21.3 m*<br>(1 d – 14.3 y)                                  |

d=days; m=months; y=years;

\* Median durations of loco-regional control were longer than median overall survival because all events other than loco-regional were censored.

## Appendix A8: Surrogacy analyses results

Each time, two models based on Hougaard and on Clayton copulas were fitted, while the optimal model according to the Akaike's criterion was retained and presented.

Abbreviations: CI= confidence interval, DFS=disease-free survival, HR=hazard ratio, LRC=loco-regional control, OS=overall survival, PFS=progression-free survival, STE=surrogate threshold effect

### Evaluating effect of adjuvant chemotherapy in operable NSCLC – without post-operative radiotherapy

| Hougaard copula                       | Disease-free survival over the entire time range   |
|---------------------------------------|----------------------------------------------------|
| Number of trials (number of patients) | 17 (5 379)                                         |
| N events OS                           | 2 163                                              |
| N events DFS                          | 2 525                                              |
| Individual level                      |                                                    |
| $\rho^2$                              | 0.83 [0.83-0.83]                                   |
| Trial level, unweighted               |                                                    |
| $R^2$                                 | 0.92 [0.88-0.95]                                   |
| Regression equation, unweighted       | $\log(\text{HR OS})=0.08+0.98.\log(\text{HR PFS})$ |
| STE                                   | 0.88                                               |

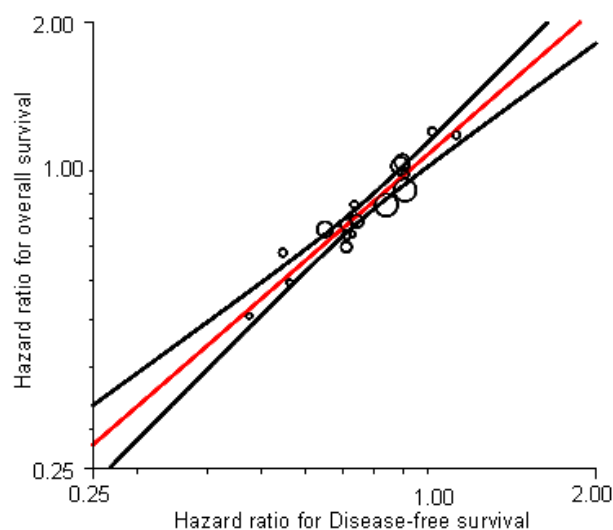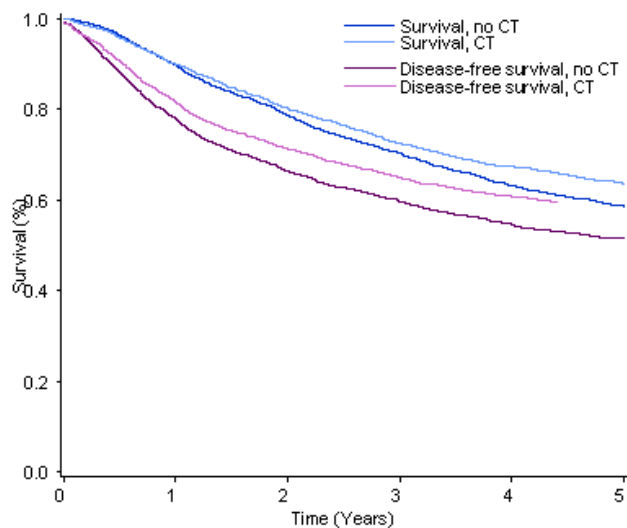

| $R^2$ – weighted regression | Intercept [95% CI] – weighted regression | Slope [95% CI] – weighted regression |
|-----------------------------|------------------------------------------|--------------------------------------|
| 0.83                        | 0.05 [-0.01 – 0.11]                      | 0.91 [0.68 – 1.14]                   |

**Evaluating effect of adjuvant chemotherapy in operable NSCLC – with post-operative radiotherapy**

|                                       |                                                    |
|---------------------------------------|----------------------------------------------------|
| Hougaard copula                       | Disease-free survival over the entire time range   |
| Number of trials (number of patients) | 7 (2 247)                                          |
| N events OS                           | 1 566                                              |
| N events DFS                          | 1 673                                              |
| Individual level                      |                                                    |
| $\rho^2$                              | 0.87 [0.87-0.87]                                   |
| Trial level, unweighted               |                                                    |
| $R^2$                                 | 0.99 [0.98-1.00]                                   |
| Regression equation, unweighted       | $\log(\text{HR OS})=0.01+0.66.\log(\text{HR PFS})$ |
| STE                                   | 0.95                                               |

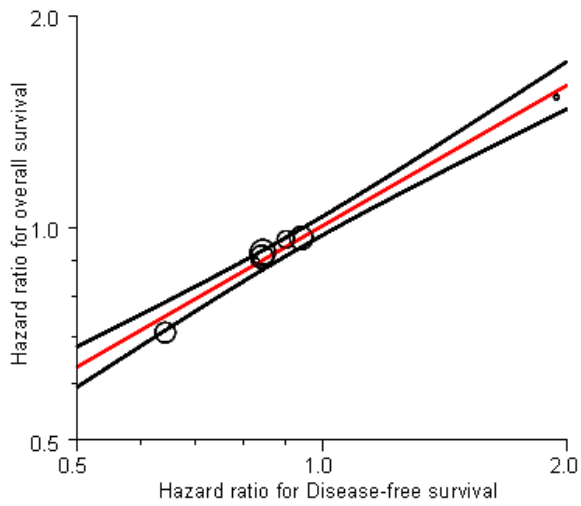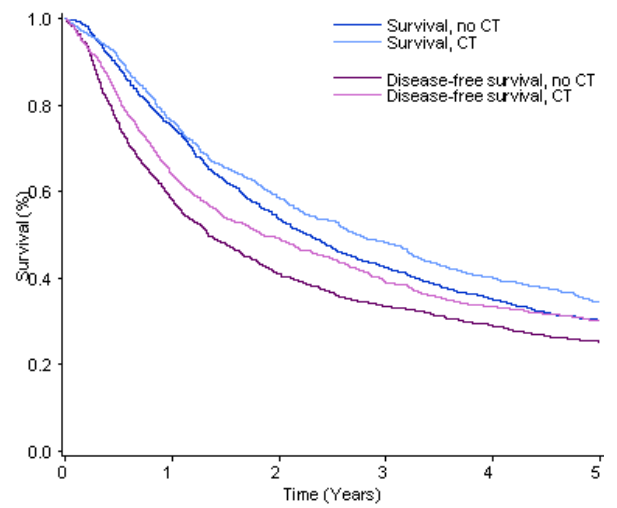

| $R^2$ – weighted regression | Intercept [95% CI] – weighted regression | Slope [95% CI] – weighted regression |
|-----------------------------|------------------------------------------|--------------------------------------|
| 0.96                        | 0.03 [-0.01 – 0.07]                      | 0.77 [0.61 – 0.94]                   |

## Evaluating effect of sequential chemotherapy in locally advanced NSCLC

| Clayton copula                        | Progression-free survival over the entire time range |
|---------------------------------------|------------------------------------------------------|
| Number of trials (number of patients) | 8 (1 458)                                            |
| N events OS                           | 1 333                                                |
| N events PFS                          | 1 375                                                |
| Individual level                      |                                                      |
| $\rho^2$                              | 0.77 [0.77-0.77]                                     |
| Trial level, unweighted               |                                                      |
| $R^2$                                 | 0.96 [0.93-0.99]                                     |
| Regression equation, unweighted       | $\log(\text{HR OS})=0.04+1.22.\log(\text{HR PFS})$   |
| STE                                   | 0.93                                                 |

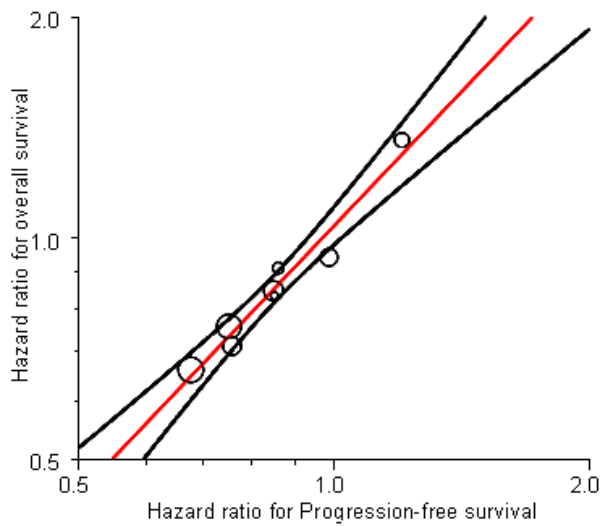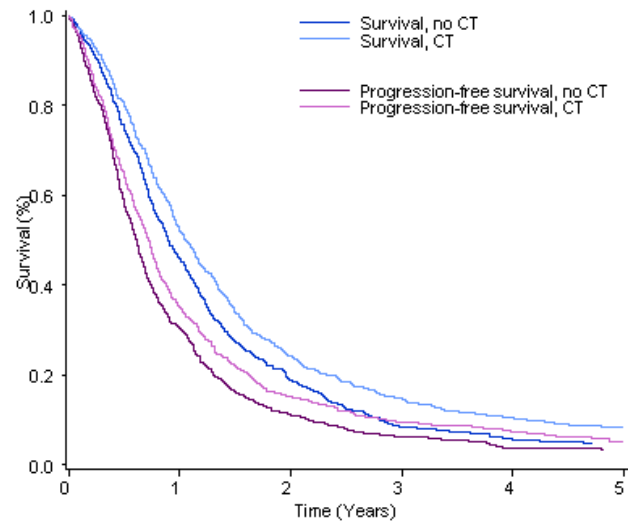

| $R^2$ – weighted regression | Intercept [95% CI] – weighted regression | Slope [95% CI] – weighted regression |
|-----------------------------|------------------------------------------|--------------------------------------|
| 0.96                        | 0.03 [-0.03 – 0.10]                      | 1.16 [0.93 – 1.40]                   |

## Evaluating effect of concurrent chemotherapy in locally advanced NSCLC

### Progression-free survival

| Hougaard copula                       | Progression-free survival over the entire time range |
|---------------------------------------|------------------------------------------------------|
| Number of trials (number of patients) | 15 (2 552)                                           |
| N events OS                           | 2 305                                                |
| N events PFS                          | 2 391                                                |
| Individual level                      |                                                      |
| $\rho^2$                              | 0.85 [0.85-0.85]                                     |
| Trial level, unweighted               |                                                      |
| $R^2$                                 | 0.97 [0.96-0.99]                                     |
| Regression equation, unweighted       | $\log(\text{HR OS})=0.01+0.87.\log(\text{HR PFS})$   |
| STE                                   | 0.95                                                 |

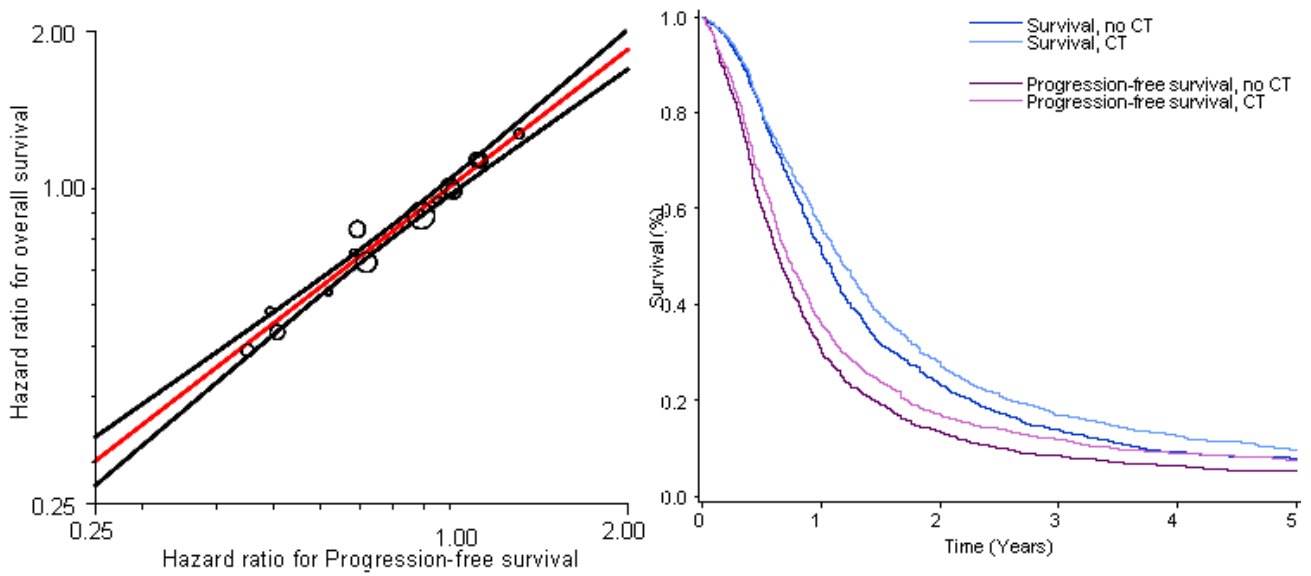

| $R^2$ – weighted regression | Intercept [95% CI] – weighted regression | Slope [95% CI] – weighted regression |
|-----------------------------|------------------------------------------|--------------------------------------|
| 0.96                        | 0.01 [-0.03 – 0.04]                      | 0.88 [0.78 – 0.99]                   |

### Loco-regional control

| Hougaard copula                       | Loco-regional control over the entire time range             |
|---------------------------------------|--------------------------------------------------------------|
| Number of trials (number of patients) | 13 (2 123)                                                   |
| N events OS                           | 1 929                                                        |
| N events LRC                          | 744                                                          |
| Individual level                      |                                                              |
| $\rho^2$                              | 0.71 [0.71-0.71]                                             |
| Trial level, unweighted               |                                                              |
| $R^2$                                 | 0.85 [0.77-0.92]                                             |
| Regression equation, unweighted       | $\log(\text{HR OS}) = 0.00 + 0.64 \cdot \log(\text{HR LRC})$ |
| STE                                   | 0.89                                                         |

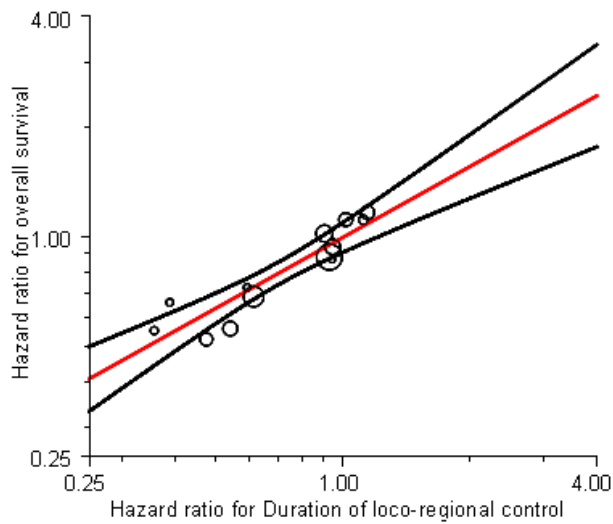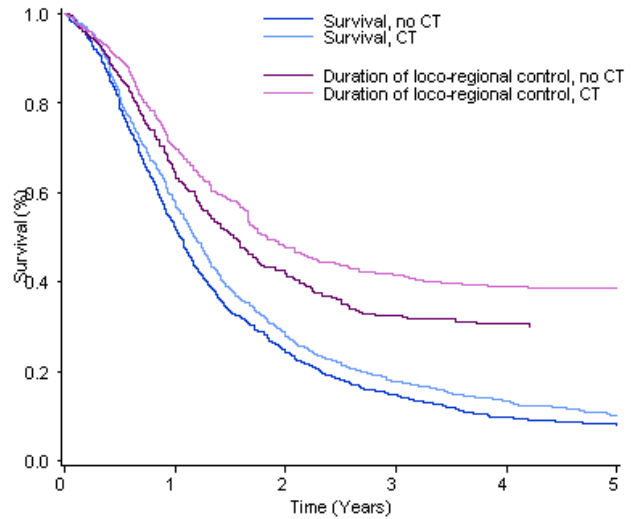

| $R^2$ – weighted regression | Intercept [95% CI] – weighted regression | Slope [95% CI] – weighted regression |
|-----------------------------|------------------------------------------|--------------------------------------|
| 0.87                        | -0.01 [-0.08 – 0.07]                     | 0.75 [0.56 – 0.94]                   |

## Evaluating effect of sequential versus concurrent chemotherapy in locally advanced NSCLC

| Hougaard copula                       | Progression-free survival over the entire time range          |
|---------------------------------------|---------------------------------------------------------------|
| Number of trials (number of patients) | 6 (1 201)                                                     |
| N events OS                           | 1 065                                                         |
| N events PFS                          | 1 094                                                         |
| Individual level                      |                                                               |
| $\rho^2$                              | 0.83 [0.83-0.83]                                              |
| Trial level, unweighted               |                                                               |
| $R^2$                                 | 0.89 [0.81-0.97]                                              |
| Regression equation, unweighted       | $\log(\text{HR OS}) = -0.01 + 0.85 \cdot \log(\text{HR PFS})$ |
| STE                                   | 0.90                                                          |

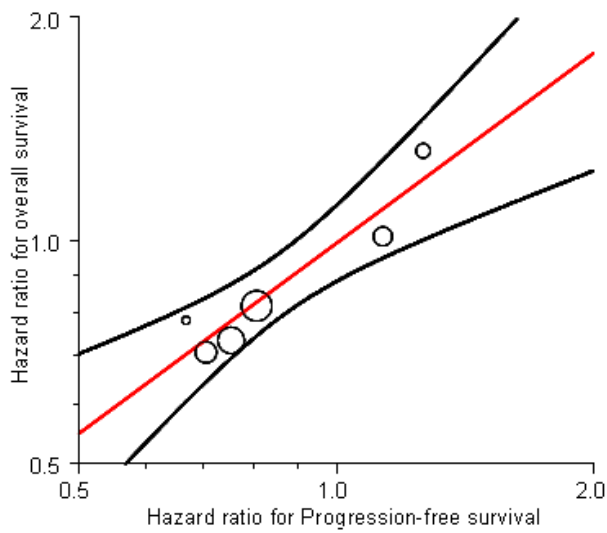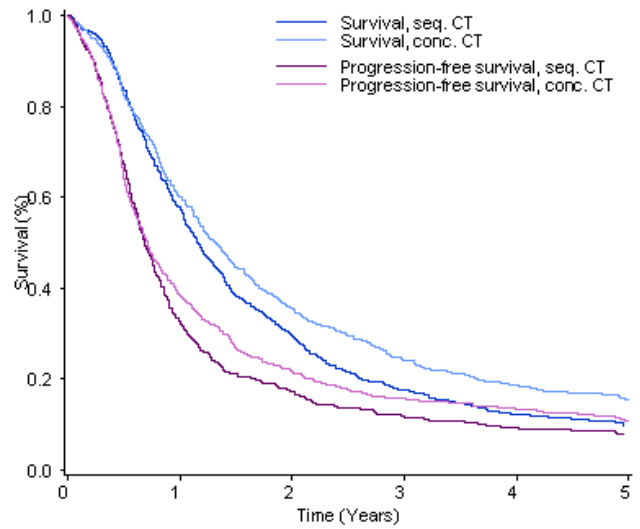

| $R^2$ – weighted regression | Intercept [95% CI] – weighted regression | Slope [95% CI] – weighted regression |
|-----------------------------|------------------------------------------|--------------------------------------|
| 0.92                        | -0.03 [-0.12 – 0.06]                     | 0.90 [0.55 – 1.25]                   |

## Evaluating effect of modified radiotherapy versus conventional radiotherapy in lung cancer

### Progression-free survival

| Hougaard copula                       | Progression-free survival over the entire time range          |
|---------------------------------------|---------------------------------------------------------------|
| Number of trials (number of patients) | 12 (2 685)                                                    |
| N events OS                           | 2 471                                                         |
| N events PFS                          | 2 562                                                         |
| Individual level                      |                                                               |
| $\rho^2$                              | 0.81 [0.81-0.81]                                              |
| Trial level, unweighted               |                                                               |
| $R^2$                                 | 0.96 [0.93-0.98]                                              |
| Regression equation, unweighted       | $\log(\text{HR OS}) = -0.04 + 0.99 \cdot \log(\text{HR PFS})$ |
| STE                                   | 1.00                                                          |

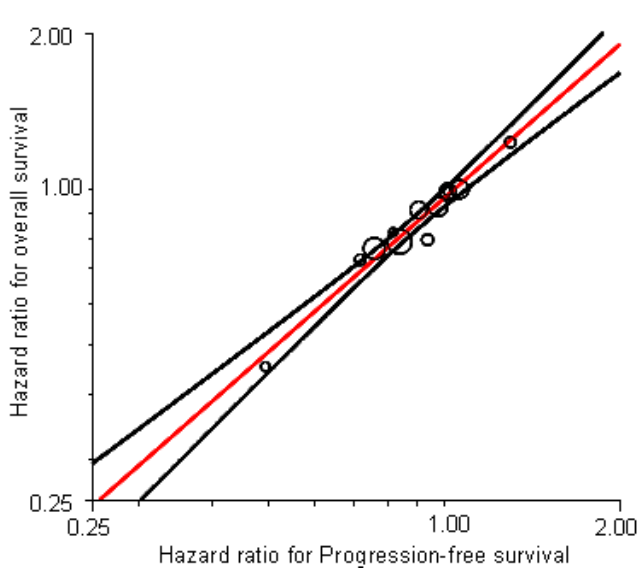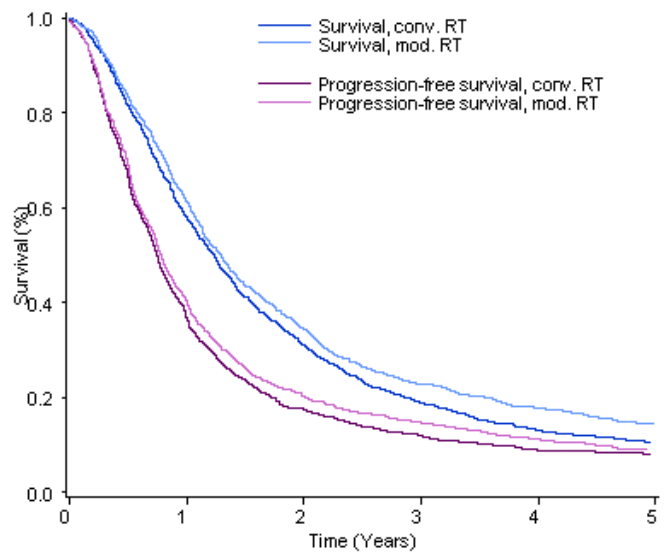

| $R^2$ – weighted regression | Intercept [95% CI] – weighted regression | Slope [95% CI] – weighted regression |
|-----------------------------|------------------------------------------|--------------------------------------|
| 0.94                        | -0.04 [-0.08 – -0.01]                    | 0.94 [0.78 – 1.11]                   |



## Loco-regional control

| Hougaard copula                       | Loco-regional control over the entire time range             |
|---------------------------------------|--------------------------------------------------------------|
| Number of trials (number of patients) | 10 (2 079)                                                   |
| N events OS                           | 1 915                                                        |
| N events LRC                          | 894                                                          |
| Individual level                      |                                                              |
| $\rho^2$                              | 0.61 [0.61-0.61]                                             |
| Trial level, unweighted               |                                                              |
| $R^2$                                 | 0.95[0.91-0.98]                                              |
| Regression equation, unweighted       | $\log(\text{HR OS}) = 0.00 + 0.75 \cdot \log(\text{HR LRC})$ |
| STE                                   | 0.95                                                         |

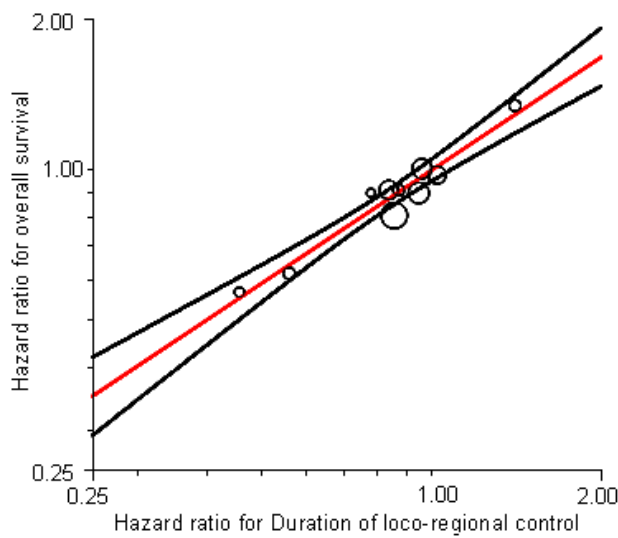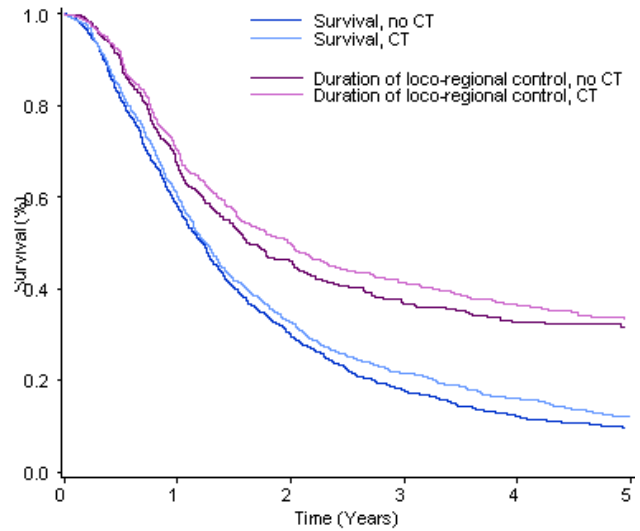

| $R^2$ – weighted regression | Intercept [95% CI] – weighted regression | Slope [95% CI] – weighted regression |
|-----------------------------|------------------------------------------|--------------------------------------|
| 0.88                        | -0.03 [-0.08 – 0.03]                     | 0.76 [0.53 – 0.99]                   |

## Summary of unweighted regression lines

**Table 4: Summary of surrogacy results**

|                                              | Non weighted<br>Regression<br>intercept | [ 95%<br>CI ]    | Non weighted<br>Regression slope | [ 95%<br>CI ]   | STE  |
|----------------------------------------------|-----------------------------------------|------------------|----------------------------------|-----------------|------|
| <b>Progression/Disease-free survival</b>     |                                         |                  |                                  |                 |      |
| <b>Operable NSCLC</b>                        |                                         |                  |                                  |                 |      |
| Without post-operative radiotherapy          | 0.08                                    | [ 0.02 - 0.14 ]  | 0.98                             | [ 0.82 - 1.14 ] | 0.88 |
| With post-operative radiotherapy             | 0.01                                    | [ -0.02 - 0.04 ] | 0.66                             | [ 0.57 - 0.76 ] | 0.95 |
| <b>Locally advanced NSCLC</b>                |                                         |                  |                                  |                 |      |
| Sequential chemotherapy                      | 0.04                                    | [ -0.02 - 0.10 ] | 1.22                             | [ 0.96 - 1.48 ] | 0.93 |
| Concurrent chemotherapy                      | 0.01                                    | [ -0.03 - 0.05 ] | 0.87                             | [ 0.78 - 0.96 ] | 0.95 |
| Sequential versus concurrent<br>chemotherapy | -0.01                                   | [ -0.13 - 0.11 ] | 0.85                             | [ 0.44 - 1.27 ] | 0.90 |
| <b>Locally advanced lung cancer</b>          |                                         |                  |                                  |                 |      |
| Radiotherapy                                 | -0.04                                   | [ -0.08 - 0.00 ] | 0.99                             | [ 0.84 - 1.14 ] | 1.00 |
| <b>Loco-regional control</b>                 |                                         |                  |                                  |                 |      |
| <b>Locally advanced NSCLC</b>                |                                         |                  |                                  |                 |      |
| Concurrent chemotherapy                      | 0.00                                    | [ -0.10 - 0.09 ] | 0.64                             | [ 0.46 - 0.83 ] | 0.89 |
| <b>Locally advanced lung cancer</b>          |                                         |                  |                                  |                 |      |
| Radiotherapy                                 | 0.00                                    | [ -0.05 - 0.05 ] | 0.75                             | [ 0.61 - 0.90 ] | 0.95 |

## Appendix A9: Sensitivity analysis: different cut-off points

Different cut-off time points are explored for DFS/PFS. OS is censored at 5 years.

|                                              | Number of events (% of total events) | Individual level    | Trial level, unweighted |                        |                      | STE  |
|----------------------------------------------|--------------------------------------|---------------------|-------------------------|------------------------|----------------------|------|
|                                              |                                      | $\rho^2$            | $R^2$                   | Intercept              | Slope                |      |
| <b>Adjuvant, CT vs no CT</b>                 |                                      |                     |                         |                        |                      |      |
| Cut-off at 1 yr                              | 1077 (43%)                           | 0.66<br>[0.66-0.66] | 0.62<br>[0.47-0.76]     | 0.02<br>[-0.10;0.15]   | 0.67<br>[0.38-0.96]  | 0.84 |
| Cut-off at 1.5 yr                            | 1436 (57%)                           | 0.71<br>[0.71-0.71] | 0.75<br>[0.65-0.86]     | 0.05<br>[-0.04;0.16]   | 0.78<br>[0.54-1.03]  | 0.85 |
| Cut-off at 2 yr                              | 1658 (66%)                           | 0.74<br>[0.74-0.74] | 0.86<br>[0.80-0.92]     | 0.07<br>[-0.01;0.14]   | 0.82<br>[0.64-1.00]  | 0.86 |
| Cut-off at 2.5 yr                            | 1845 (73%)                           | 0.76<br>[0.76-0.76] | 0.87<br>[0.80-0.93]     | 0.06<br>[-0.01;0.13]   | 0.80<br>[0.62-0.97]  | 0.86 |
| Cut-off at 3 yr                              | 1994 (79%)                           | 0.77<br>[0.77-0.77] | 0.88<br>[0.83-0.93]     | 0.06<br>[-0.01;0.13]   | 0.81<br>[0.65-0.97]  | 0.87 |
| <b>Adjuvant, RT+ CT vs RT</b>                |                                      |                     |                         |                        |                      |      |
| Cut-off at 1 yr                              | 869 (52%)                            | 0.72<br>[0.72-0.72] | 0.95<br>[0.92-0.99]     | 0.02<br>[-0.04;0.07]   | 0.61<br>[0.46-0.77]  | 0.90 |
| Cut-off at 1.5 yr                            | 1091 (65%)                           | 0.76<br>[0.76-0.76] | 0.95<br>[0.92-0.99]     | 0.01<br>[-0.05;0.07]   | 0.60<br>[0.45-0.76]  | 0.90 |
| Cut-off at 2 yr                              | 1221 (73%)                           | 0.77<br>[0.77-0.77] | 0.94<br>[0.90-0.98]     | 0.01<br>[-0.05;0.08]   | 0.59<br>[0.42-0.77]  | 0.89 |
| Cut-off at 2.5 yr                            | 1320 (79%)                           | 0.79<br>[0.79-0.79] | 0.96<br>[0.92-0.99]     | 0.02<br>[-0.04;0.07]   | 0.67<br>[0.50-0.84]  | 0.90 |
| Cut-off at 3 yr                              | 1411 (84%)                           | 0.81<br>[0.81-0.81] | 0.96<br>[0.93-0.99]     | 0.01<br>[-0.05;0.06]   | 0.66<br>[0.51-0.82]  | 0.92 |
| <b>Locally advanced, RT + Seq. CT vs RT</b>  |                                      |                     |                         |                        |                      |      |
| Cut-off at 1 yr                              | 969 (70%)                            | 0.76<br>[0.76-0.76] | 0.79<br>[0.67-0.92]     | -0.04<br>[-0.14;0.07]  | 1.13<br>[0.56-1.71]  | 0.95 |
| Cut-off at 1.5 yr                            | 1160 (84%)                           | 0.74<br>[0.74-0.74] | 0.86<br>[0.77-0.95]     | -0.03<br>[-0.10;0.05]  | 0.98<br>[0.58-1.38]  | 0.96 |
| Cut-off at 2 yr                              | 1244 (90%)                           | 0.74<br>[0.74-0.74] | 0.77<br>[0.63-0.91]     | -0.02<br>[-0.12;0.08]  | 0.98<br>[0.44-1.52]  | 0.94 |
| <b>Locally advanced, RT + Conc. CT vs RT</b> |                                      |                     |                         |                        |                      |      |
| Cut-off at 1 yr                              | 1689 (71%)                           | 0.76<br>[0.76-0.76] | 0.93<br>[0.90-0.97]     | 0.00<br>[-0.05;0.05]   | 0.75<br>[0.63-0.87]  | 0.94 |
| Cut-off at 1.5 yr                            | 1990 (83%)                           | 0.77<br>[0.77-0.77] | 0.94<br>[0.90-0.97]     | 0.00<br>[-0.05;0.05]   | 0.77<br>[0.65-0.89]  | 0.94 |
| Cut-off at 2 yr                              | 2149 (90%)                           | 0.79<br>[0.79-0.79] | 0.95<br>[0.92-0.97]     | 0.00<br>[-0.04;0.05]   | 0.80<br>[0.68-0.91]  | 0.94 |
| <b>Locally advanced, RT+ Seq. CT vs RT</b>   |                                      |                     |                         |                        |                      |      |
| Cut-off at 1 yr                              | 773 (71%)                            | 0.72<br>[0.72-0.72] | 0.64<br>[0.41-0.87]     | -0.07<br>[-0.22;0.08]  | 0.60<br>[-0.02;1.22] | 0.92 |
| Cut-off at 1.5 yr                            | 912 (83%)                            | 0.76<br>[0.76-0.76] | 0.70<br>[0.49-0.87]     | -0.06<br>[-0.21;0.08]  | 0.61<br>[0.05-1.17]  | 0.91 |
| Cut-off at 2 yr                              | 964 (88%)                            | 0.77<br>[0.77-0.77] | 0.75<br>[0.58-0.92]     | -0.05<br>[-0.19;0.08]  | 0.64<br>[0.13-1.16]  | 0.91 |
| <b>MAR-LC</b>                                |                                      |                     |                         |                        |                      |      |
| Cut-off at 1 yr                              | 1644 (64%)                           | 0.72<br>[0.72-0.72] | 0.77<br>[0.66-0.88]     | -0.09<br>[-0.16;-0.02] | 0.86<br>[0.53-1.19]  | 1.02 |
| Cut-off at 1.5 yr                            | 2004 (78%)                           | 0.74<br>[0.74-0.74] | 0.83<br>[0.74-0.91]     | -0.06<br>[-0.13;0.01]  | 1.05<br>[0.71-1.38]  | 1.00 |
| Cut-off at 2 yr                              | 2165 (85%)                           | 0.76<br>[0.76-0.76] | 0.85<br>[0.78-0.93]     | -0.05<br>[-0.11;0.02]  | 1.02<br>[0.72-1.32]  | 0.99 |

CT=chemotherapy; conc=concurrent;RT=radiotherapy, sequ=sequential See appendix 8 for other abbreviations

---

## Appendix A10: Leave-one out crossvalidation results

---

### Operable NSCLC without post-operative radiotherapy – DFS

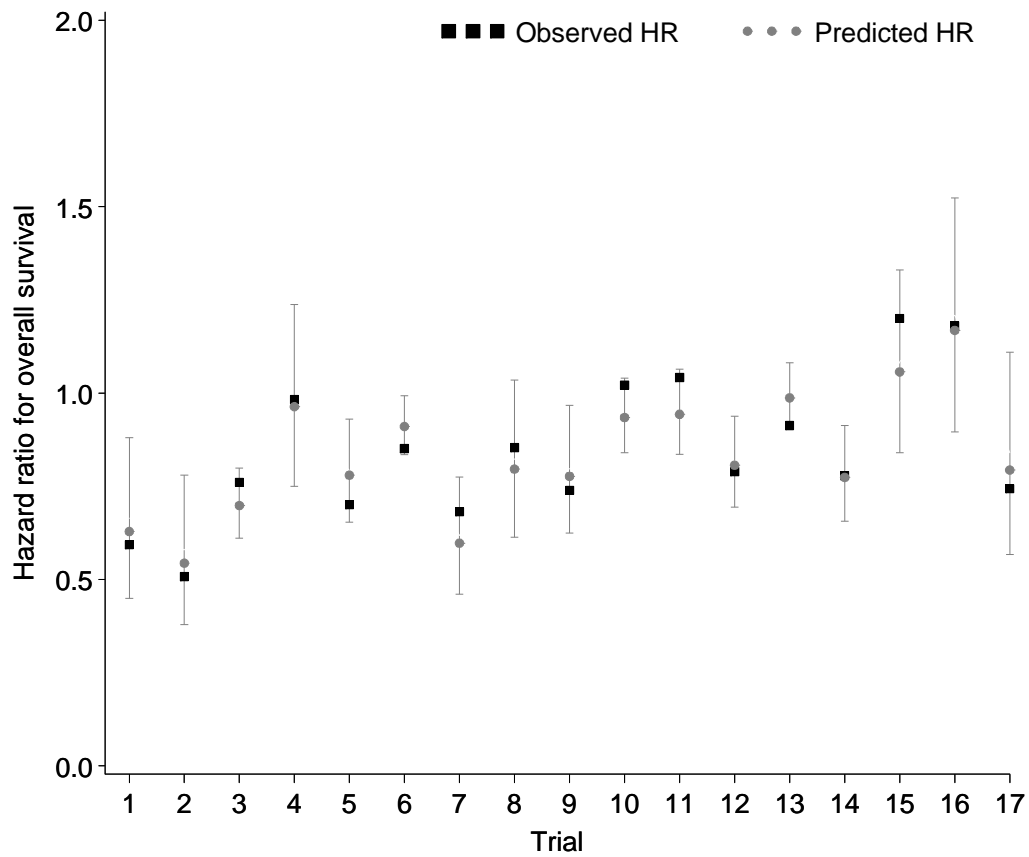

### Operable NSCLC with post-operative radiotherapy - DFS

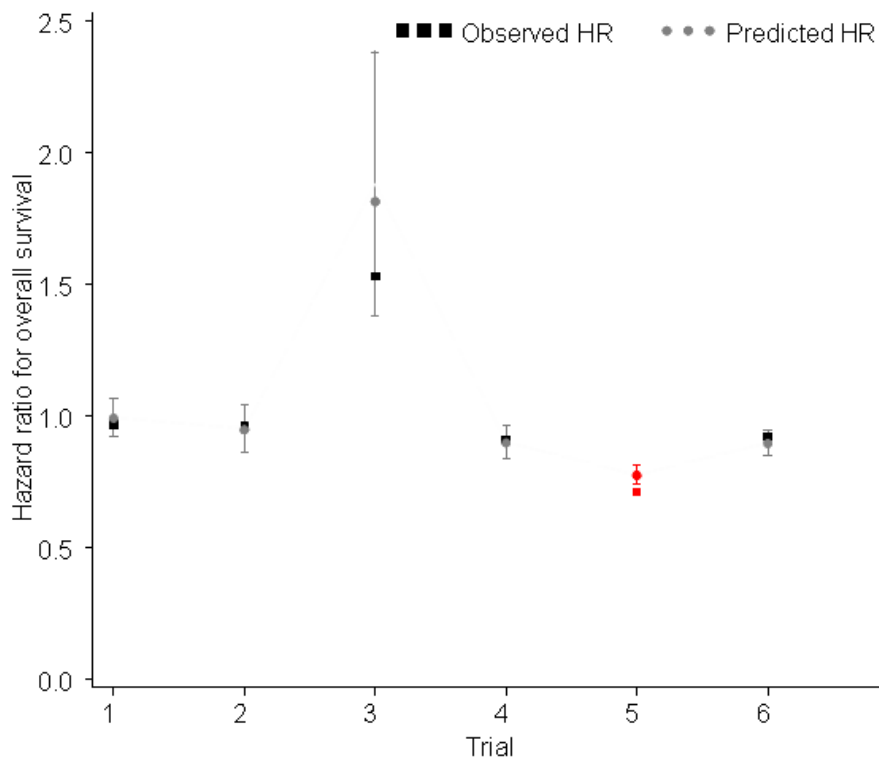

**Locally advanced NSCLC, sequential chemotherapy – PFS**

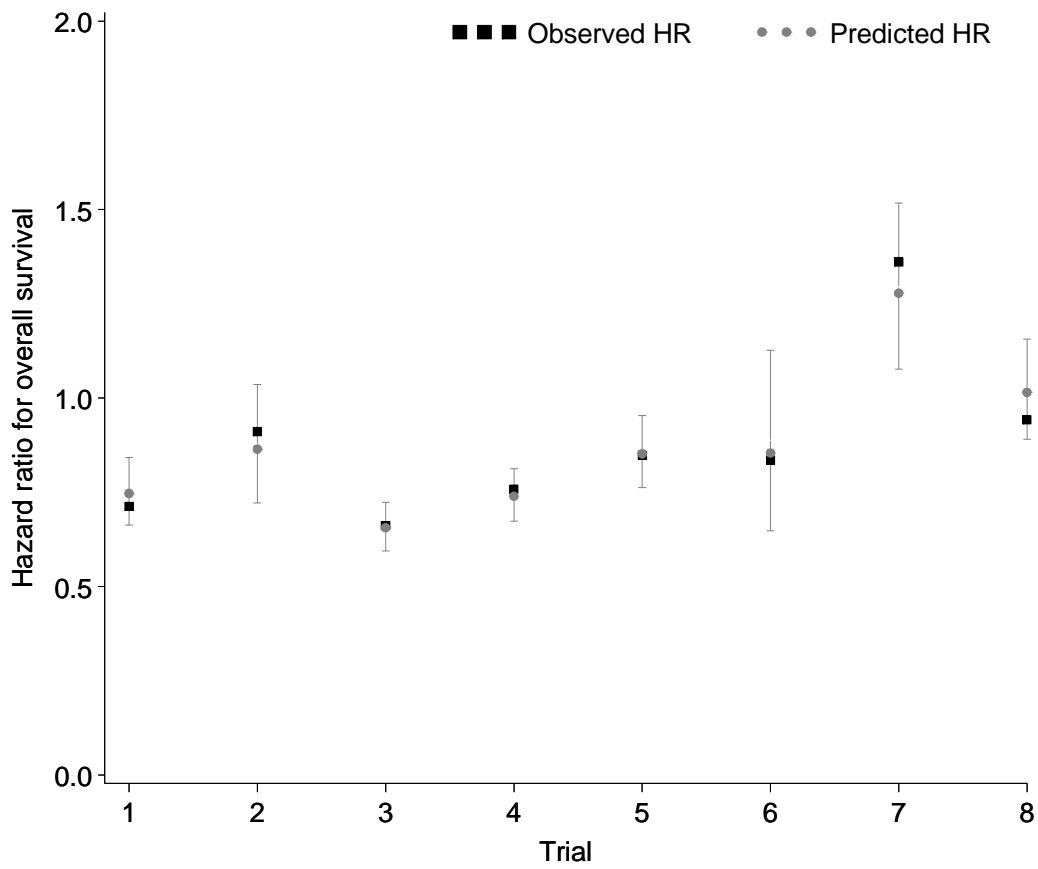

**Locally advanced NSCLC, concurrent chemotherapy – PFS**

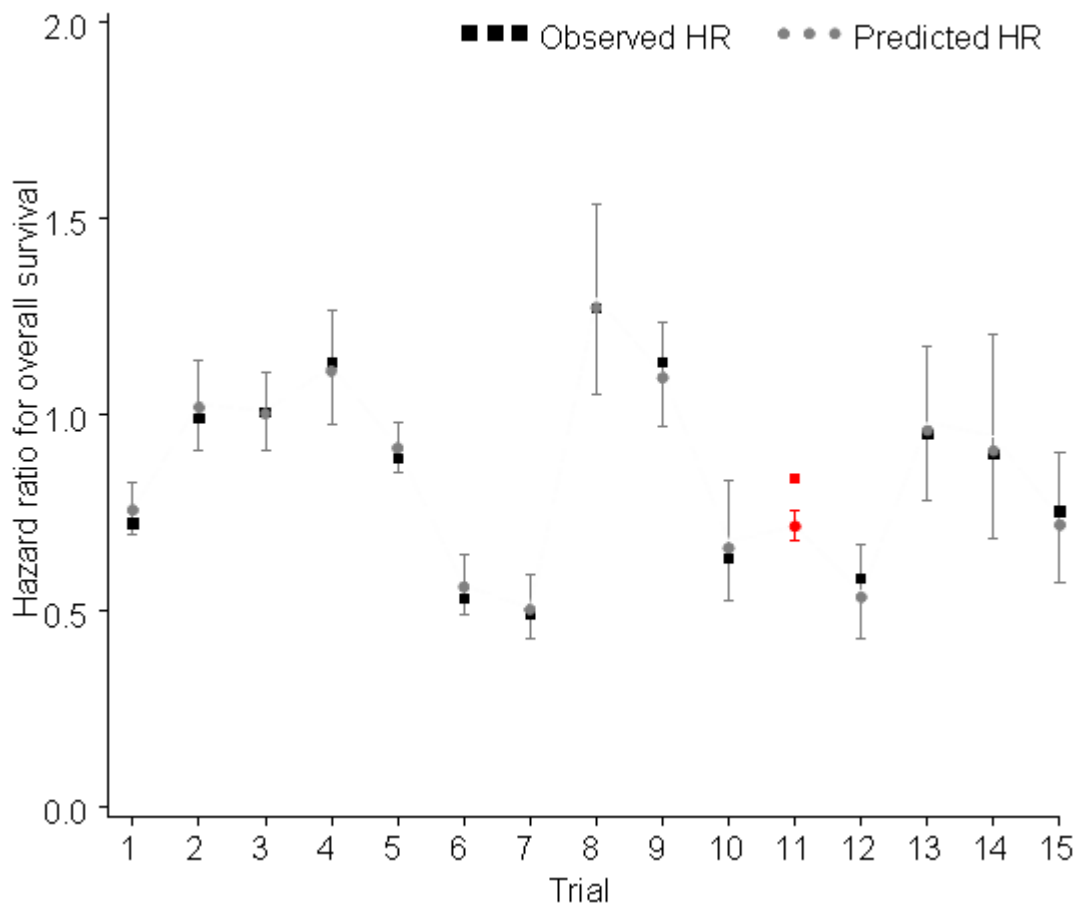

**Locally advanced NSCLC, concurrent chemotherapy – LRC**

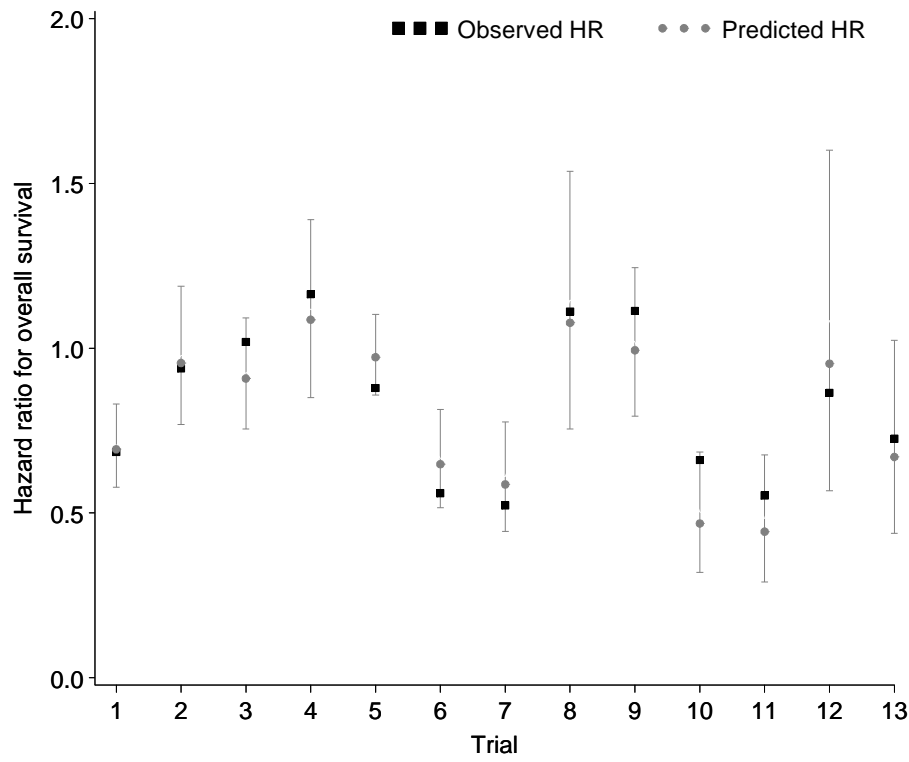

**Locally advanced NSCLC, sequential versus concurrent chemotherapy – PFS**

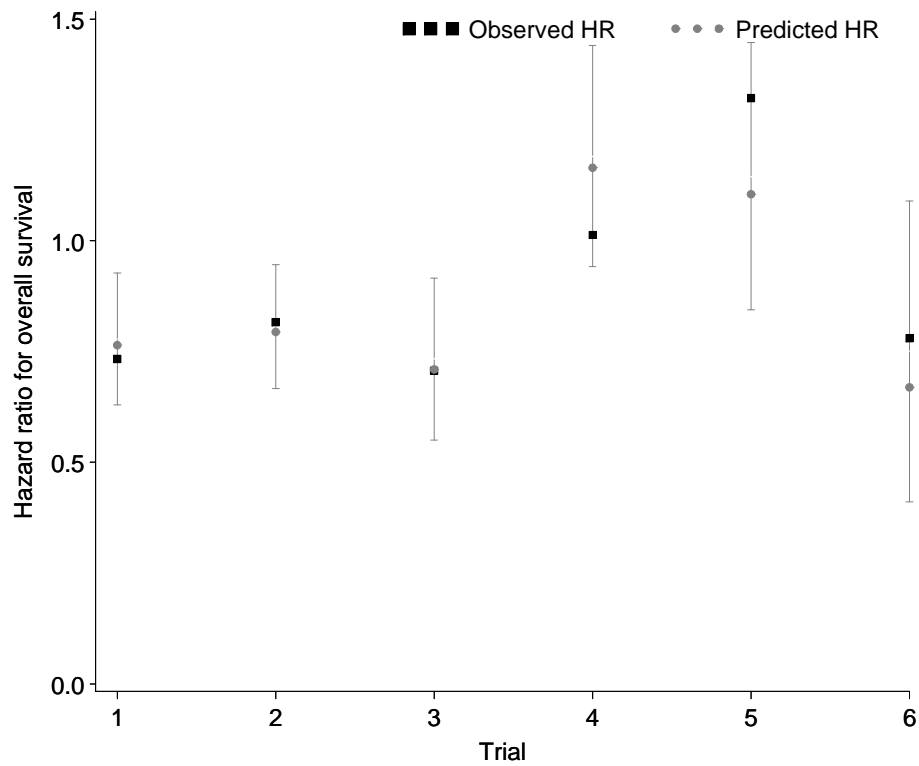

### Modified radiotherapy – PFS

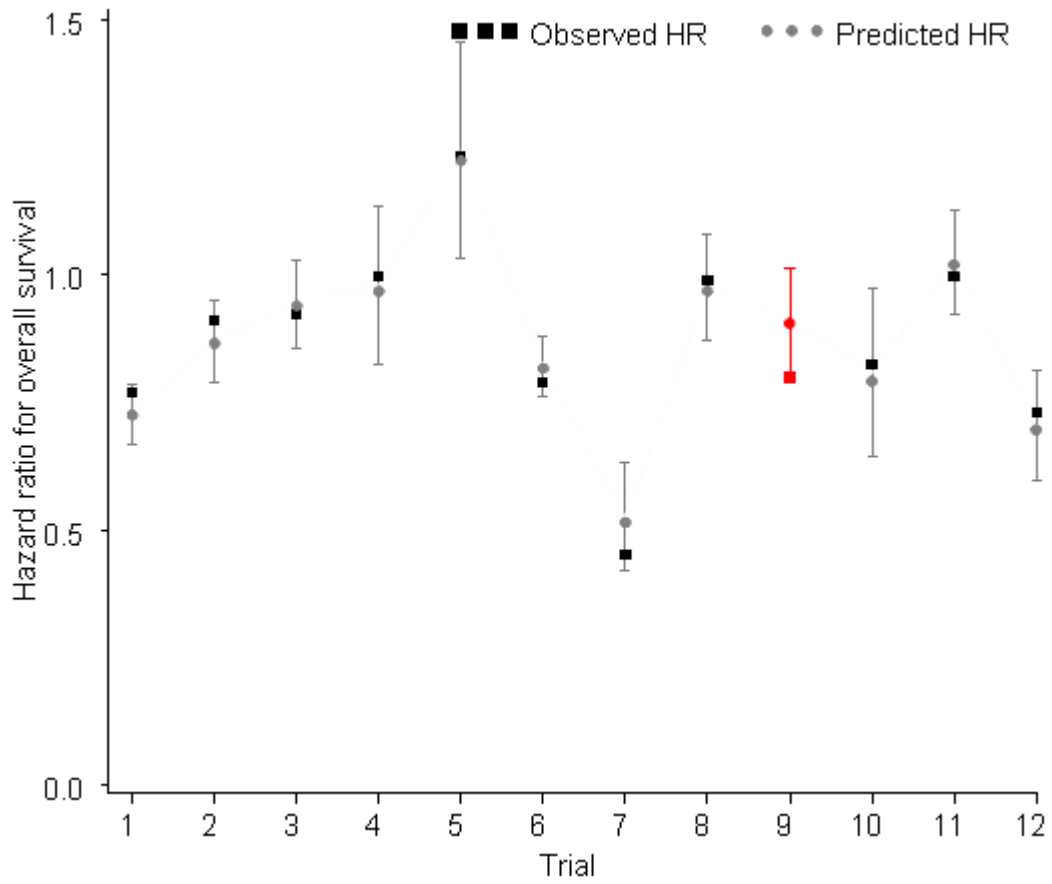

### Modified radiotherapy - LRC

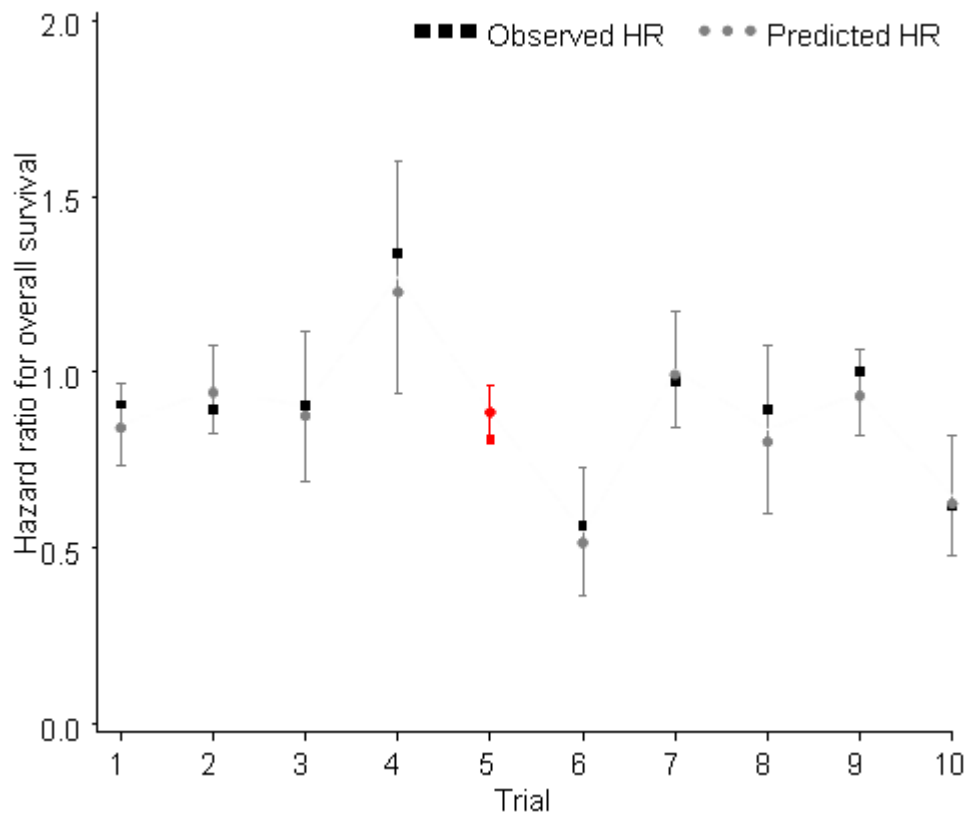

**Results are for validation of DFS/PFS if no otherwise specified.**

| <b>Table 5: Summary of cross-validation results</b> |                                                                                                                                   |
|-----------------------------------------------------|-----------------------------------------------------------------------------------------------------------------------------------|
| <b>Meta-analysis</b>                                | <b>Number of trials with predicted effect on OS included in the 95% prediction interval</b><br>/<br><b>Total number of trials</b> |
| <b>Operable NSCLC</b>                               |                                                                                                                                   |
| Without radiotherapy                                | 17 / 17                                                                                                                           |
| With radiotherapy                                   | 6 / 7                                                                                                                             |
| <b>Locally advanced NSCLC</b>                       |                                                                                                                                   |
| Sequential chemotherapy                             | 8 / 8                                                                                                                             |
| Concurrent chemotherapy                             | 14 / 15<br>(13 / 13 for LRC)                                                                                                      |
| Sequential versus concurrent chemotherapy           | 6 / 6                                                                                                                             |
| <b>Locally advanced lung cancer</b>                 |                                                                                                                                   |
| Radiotherapy                                        | 11 / 12<br>(9/10 for LRC)                                                                                                         |

DFS=disease-free survival, LRC=loco-regional control, OS=overall survival, PFS=progression-free survival
